# Supplementary material
Source: publisher figshare collection journal article supplement (https://springernature.figshare.com/ndownloader/files/12384062)
Supplement: Supplementary file 1 [file 12384062]

## Sheet: amphibian_dat
Order	Family	Genus	Species	Subspecies	Genus_Species	Sample size	Sex	Method	Body weight (g)	SVL (mm)	Brain weight (g)	Brain volume (mm3)	Age Class	Species Name in original article	Reference	Remark
Anura	Alytidae	Alytes	obstetricans		Alytes_obstetricans	1	unknown	Mass	7.7		0.041		unknown		Dubois E (1913) On the relation between the quantity of brain and the size of the body in vertebrates
Anura	Bombinatoridae	Bombina	maxima		Bombina_maxima	1	m	Mass	18.5439	60.24	0.0453	22	adult		Zeng ZB et al. (2016) Ecol. Evol. 6:7070-7079	Used emprical data converting anuran brain volume to brain mass: mass (g) = 0.0016 * vol (mm3) + 0.0101, based on corresponding mass and volume data from Zeng et al (2016) and Liao et al. (2016)
Anura	Bombinatoridae	Bombina	maxima		Bombina_maxima	1	m	Mass	11.7013	61.54	0.05298	26.8	adult		Zeng ZB et al. (2016) Ecol. Evol. 6:7070-7079	Used emprical data converting anuran brain volume to brain mass: mass (g) = 0.0016 * vol (mm3) + 0.0101, based on corresponding mass and volume data from Zeng et al (2016) and Liao et al. (2016)
Anura	Bombinatoridae	Bombina	maxima		Bombina_maxima	1	m	Mass	22.4508	59.8	0.0587	29.87	adult		Liao WB et al. (2016) Am.Nat. 188:693-700
Anura	Bombinatoridae	Bombina	maxima		Bombina_maxima	1	m	Mass	23.5498	60.39	0.0338		adult		Liao WB et al. (2016) Am.Nat. 188:693-700
Anura	Bombinatoridae	Bombina	maxima		Bombina_maxima	1	m	Mass	23.091	60.51	0.04		adult		Liao WB et al. (2016) Am.Nat. 188:693-700
Anura	Bombinatoridae	Bombina	maxima		Bombina_maxima	1	m	Mass	20.6702	61.89	0.041		adult		Liao WB et al. (2016) Am.Nat. 188:693-700
Anura	Bombinatoridae	Bombina	maxima		Bombina_maxima	1	m	Mass	18.5245	50.94	0.0482	18.76	adult		Liao WB et al. (2016) Am.Nat. 188:693-700
Anura	Bombinatoridae	Bombina	maxima		Bombina_maxima	1	m	Mass	16.8925	54.76	0.0443	24.5	adult		Liao WB et al. (2016) Am.Nat. 188:693-700
Anura	Bombinatoridae	Bombina	maxima		Bombina_maxima	1	m	Mass	16.705	56.43	0.0393	18.44	adult		Liao WB et al. (2016) Am.Nat. 188:693-700
Anura	Bombinatoridae	Bombina	maxima		Bombina_maxima	1	m	Mass	20.8968	57.95	0.0589	26.41	adult		Liao WB et al. (2016) Am.Nat. 188:693-700
Anura	Bombinatoridae	Bombina	maxima		Bombina_maxima	1	m	Mass	19.4536	58.11	0.047	22.15	adult		Liao WB et al. (2016) Am.Nat. 188:693-700
Anura	Bombinatoridae	Bombina	maxima		Bombina_maxima	1	m	Mass	23.7264	59.24	0.0511	23.41	adult		Liao WB et al. (2016) Am.Nat. 188:693-700
Anura	Bufonidae	Bufo	bufo		Bufo_bufo	1	unknown	Mass	44.5		0.073		unknown	Bufo vulgaris	Dubois E (1913) On the relation between the quantity of brain and the size of the body in vertebrates
Anura	Bufonidae	Bufo	gargarizans		Bufo_gargarizans	1	m	Mass	23.531	71.1	0.093828	52.33	adult	Bufo_andrewsi	Zeng ZB et al. (2016) Ecol. Evol. 6:7070-7079	Used emprical data converting anuran brain volume to brain mass: mass (g) = 0.0016 * vol (mm3) + 0.0101, based on corresponding mass and volume data from Zeng et al (2016) and Liao et al. (2016)
Anura	Bufonidae	Bufo	gargarizans		Bufo_gargarizans	1	m	Mass	25.522	76.54	0.097572	54.67	adult	Bufo_andrewsi	Zeng ZB et al. (2016) Ecol. Evol. 6:7070-7079	Used emprical data converting anuran brain volume to brain mass: mass (g) = 0.0016 * vol (mm3) + 0.0101, based on corresponding mass and volume data from Zeng et al (2016) and Liao et al. (2016)
Anura	Bufonidae	Bufo	gargarizans		Bufo_gargarizans	1	m	Mass	24.5213	72.94	0.098564	55.29	adult	Bufo_andrewsi	Zeng ZB et al. (2016) Ecol. Evol. 6:7070-7079	Used emprical data converting anuran brain volume to brain mass: mass (g) = 0.0016 * vol (mm3) + 0.0101, based on corresponding mass and volume data from Zeng et al (2016) and Liao et al. (2016)
Anura	Bufonidae	Bufo	gargarizans		Bufo_gargarizans	1	m	Mass	19.325	70.86	0.105108	59.38	adult	Bufo_andrewsi	Zeng ZB et al. (2016) Ecol. Evol. 6:7070-7079	Used emprical data converting anuran brain volume to brain mass: mass (g) = 0.0016 * vol (mm3) + 0.0101, based on corresponding mass and volume data from Zeng et al (2016) and Liao et al. (2016)
Anura	Bufonidae	Bufo	gargarizans		Bufo_gargarizans	1	m	Mass	21.454	72.92	0.10554	59.65	adult	Bufo_andrewsi	Zeng ZB et al. (2016) Ecol. Evol. 6:7070-7079	Used emprical data converting anuran brain volume to brain mass: mass (g) = 0.0016 * vol (mm3) + 0.0101, based on corresponding mass and volume data from Zeng et al (2016) and Liao et al. (2016)
Anura	Bufonidae	Bufo	gargarizans		Bufo_gargarizans	1	m	Mass	23.567	73.84	0.108724	61.64	adult	Bufo_andrewsi	Zeng ZB et al. (2016) Ecol. Evol. 6:7070-7079	Used emprical data converting anuran brain volume to brain mass: mass (g) = 0.0016 * vol (mm3) + 0.0101, based on corresponding mass and volume data from Zeng et al (2016) and Liao et al. (2016)
Anura	Bufonidae	Bufo	gargarizans		Bufo_gargarizans	1	m	Mass	22.5478	74.3	0.109604	62.19	adult	Bufo_andrewsi	Zeng ZB et al. (2016) Ecol. Evol. 6:7070-7079	Used emprical data converting anuran brain volume to brain mass: mass (g) = 0.0016 * vol (mm3) + 0.0101, based on corresponding mass and volume data from Zeng et al (2016) and Liao et al. (2016)
Anura	Bufonidae	Bufo	gargarizans		Bufo_gargarizans	1	m	Mass	31.5541	84	0.120788	69.18	adult	Bufo_andrewsi	Zeng ZB et al. (2016) Ecol. Evol. 6:7070-7079	Used emprical data converting anuran brain volume to brain mass: mass (g) = 0.0016 * vol (mm3) + 0.0101, based on corresponding mass and volume data from Zeng et al (2016) and Liao et al. (2016)
Anura	Bufonidae	Bufo	gargarizans		Bufo_gargarizans	1	m	Mass	21.5535	71.24	0.121204	69.44	adult	Bufo_andrewsi	Zeng ZB et al. (2016) Ecol. Evol. 6:7070-7079	Used emprical data converting anuran brain volume to brain mass: mass (g) = 0.0016 * vol (mm3) + 0.0101, based on corresponding mass and volume data from Zeng et al (2016) and Liao et al. (2016)
Anura	Bufonidae	Bufo	gargarizans		Bufo_gargarizans	1	m	Mass	30.5123	78.24	0.124916	71.76	adult	Bufo_andrewsi	Zeng ZB et al. (2016) Ecol. Evol. 6:7070-7079	Used emprical data converting anuran brain volume to brain mass: mass (g) = 0.0016 * vol (mm3) + 0.0101, based on corresponding mass and volume data from Zeng et al (2016) and Liao et al. (2016)
Anura	Bufonidae	Bufo	gargarizans		Bufo_gargarizans	1	m	Mass	83.55	84.94	0.099108	55.63	adult		Zeng ZB et al. (2016) Ecol. Evol. 6:7070-7079	Used emprical data converting anuran brain volume to brain mass: mass (g) = 0.0016 * vol (mm3) + 0.0101, based on corresponding mass and volume data from Zeng et al (2016) and Liao et al. (2016)
Anura	Bufonidae	Bufo	gargarizans		Bufo_gargarizans	1	m	Mass	89.48	106.08	0.107156	60.66	adult		Zeng ZB et al. (2016) Ecol. Evol. 6:7070-7079	Used emprical data converting anuran brain volume to brain mass: mass (g) = 0.0016 * vol (mm3) + 0.0101, based on corresponding mass and volume data from Zeng et al (2016) and Liao et al. (2016)
Anura	Bufonidae	Bufo	gargarizans		Bufo_gargarizans	1	m	Mass	89.88	110.18	0.111636	63.46	adult		Zeng ZB et al. (2016) Ecol. Evol. 6:7070-7079	Used emprical data converting anuran brain volume to brain mass: mass (g) = 0.0016 * vol (mm3) + 0.0101, based on corresponding mass and volume data from Zeng et al (2016) and Liao et al. (2016)
Anura	Bufonidae	Bufo	gargarizans		Bufo_gargarizans	1	m	Mass	89.59	95.59	0.120196	68.81	adult		Zeng ZB et al. (2016) Ecol. Evol. 6:7070-7079	Used emprical data converting anuran brain volume to brain mass: mass (g) = 0.0016 * vol (mm3) + 0.0101, based on corresponding mass and volume data from Zeng et al (2016) and Liao et al. (2016)
Anura	Bufonidae	Bufo	gargarizans		Bufo_gargarizans	1	m	Mass	87.86	99.16	0.127236	73.21	adult		Zeng ZB et al. (2016) Ecol. Evol. 6:7070-7079	Used emprical data converting anuran brain volume to brain mass: mass (g) = 0.0016 * vol (mm3) + 0.0101, based on corresponding mass and volume data from Zeng et al (2016) and Liao et al. (2016)
Anura	Bufonidae	Bufo	gargarizans		Bufo_gargarizans	1	m	Mass	87.61	101.2	0.13714	79.4	adult		Zeng ZB et al. (2016) Ecol. Evol. 6:7070-7079	Used emprical data converting anuran brain volume to brain mass: mass (g) = 0.0016 * vol (mm3) + 0.0101, based on corresponding mass and volume data from Zeng et al (2016) and Liao et al. (2016)
Anura	Bufonidae	Bufo	gargarizans		Bufo_gargarizans	1	m	Mass	40.835	67.64	0.060836	31.71	adult	Bufo_minshanicus	Zeng ZB et al. (2016) Ecol. Evol. 6:7070-7079	Used emprical data converting anuran brain volume to brain mass: mass (g) = 0.0016 * vol (mm3) + 0.0101, based on corresponding mass and volume data from Zeng et al (2016) and Liao et al. (2016)
Anura	Bufonidae	Bufo	gargarizans		Bufo_gargarizans	1	m	Mass	23.9	57.33	0.1045		adult	Bufo_andrewsi	Liao WB et al. (2016) Am.Nat. 188:693-700
Anura	Bufonidae	Bufo	gargarizans		Bufo_gargarizans	1	m	Mass	32.83	67.25	0.0949		adult	Bufo_andrewsi	Liao WB et al. (2016) Am.Nat. 188:693-700
Anura	Bufonidae	Bufo	gargarizans		Bufo_gargarizans	1	m	Mass	28.27	71.32	0.1225		adult	Bufo_andrewsi	Liao WB et al. (2016) Am.Nat. 188:693-700
Anura	Bufonidae	Bufo	gargarizans		Bufo_gargarizans	1	m	Mass	39.05	71.64	0.1227		adult	Bufo_andrewsi	Liao WB et al. (2016) Am.Nat. 188:693-700
Anura	Bufonidae	Bufo	gargarizans		Bufo_gargarizans	1	m	Mass	32.85	73.37	0.1033		adult	Bufo_andrewsi	Liao WB et al. (2016) Am.Nat. 188:693-700
Anura	Bufonidae	Bufo	gargarizans		Bufo_gargarizans	1	m	Mass	33.39	74.44	0.1383		adult	Bufo_andrewsi	Liao WB et al. (2016) Am.Nat. 188:693-700
Anura	Bufonidae	Bufo	gargarizans		Bufo_gargarizans	1	m	Mass	33.54	75.04	0.1053		adult	Bufo_andrewsi	Liao WB et al. (2016) Am.Nat. 188:693-700
Anura	Bufonidae	Bufo	gargarizans		Bufo_gargarizans	1	m	Mass	31.78	75.58	0.1448		adult	Bufo_andrewsi	Liao WB et al. (2016) Am.Nat. 188:693-700
Anura	Bufonidae	Bufo	gargarizans		Bufo_gargarizans	1	m	Mass	35.21	77.28	0.148		adult	Bufo_andrewsi	Liao WB et al. (2016) Am.Nat. 188:693-700
Anura	Bufonidae	Bufo	gargarizans		Bufo_gargarizans	1	m	Mass	45.37	77.87	0.1201		adult	Bufo_andrewsi	Liao WB et al. (2016) Am.Nat. 188:693-700
Anura	Bufonidae	Bufo	gargarizans		Bufo_gargarizans	1	m	Mass	42.44	78.76	0.087		adult	Bufo_andrewsi	Liao WB et al. (2016) Am.Nat. 188:693-700
Anura	Bufonidae	Bufo	gargarizans		Bufo_gargarizans	1	m	Mass	40.66	78.76	0.1485		adult	Bufo_andrewsi	Liao WB et al. (2016) Am.Nat. 188:693-700
Anura	Bufonidae	Bufo	gargarizans		Bufo_gargarizans	1	m	Mass	34.93	79.21	0.1278		adult	Bufo_andrewsi	Liao WB et al. (2016) Am.Nat. 188:693-700
Anura	Bufonidae	Bufo	gargarizans		Bufo_gargarizans	1	m	Mass	41.52	79.4	0.1183		adult	Bufo_andrewsi	Liao WB et al. (2016) Am.Nat. 188:693-700
Anura	Bufonidae	Bufo	gargarizans		Bufo_gargarizans	1	m	Mass	44.89	79.8	0.103		adult	Bufo_andrewsi	Liao WB et al. (2016) Am.Nat. 188:693-700
Anura	Bufonidae	Bufo	gargarizans		Bufo_gargarizans	1	m	Mass	40.15	81.78	0.1024		adult	Bufo_andrewsi	Liao WB et al. (2016) Am.Nat. 188:693-700
Anura	Bufonidae	Bufo	gargarizans		Bufo_gargarizans	1	m	Mass	55.53	83.52	0.1237		adult	Bufo_andrewsi	Liao WB et al. (2016) Am.Nat. 188:693-700
Anura	Bufonidae	Bufo	gargarizans		Bufo_gargarizans	1	m	Mass	58.16	84.12	0.1627		adult	Bufo_andrewsi	Liao WB et al. (2016) Am.Nat. 188:693-700
Anura	Bufonidae	Bufo	gargarizans		Bufo_gargarizans	1	m	Mass	120.82	100.95	0.2246		adult		Liao WB et al. (2016) Am.Nat. 188:693-700
Anura	Bufonidae	Bufo	gargarizans		Bufo_gargarizans	1	m	Mass	127.24	102.21	0.2638		adult		Liao WB et al. (2016) Am.Nat. 188:693-700
Anura	Bufonidae	Bufo	gargarizans		Bufo_gargarizans	1	m	Mass	101.26	104	0.1649		adult		Liao WB et al. (2016) Am.Nat. 188:693-700
Anura	Bufonidae	Bufo	gargarizans		Bufo_gargarizans	1	m	Mass	120.84	104.48	0.2485		adult		Liao WB et al. (2016) Am.Nat. 188:693-700
Anura	Bufonidae	Bufo	gargarizans		Bufo_gargarizans	1	m	Mass	149.65	109.13	0.2228		adult		Liao WB et al. (2016) Am.Nat. 188:693-700
Anura	Bufonidae	Bufo	gargarizans		Bufo_gargarizans	1	m	Mass	128.97	110.05	0.2485		adult		Liao WB et al. (2016) Am.Nat. 188:693-700
Anura	Bufonidae	Bufo	gargarizans		Bufo_gargarizans	1	m	Mass	140.67	111.64	0.1741		adult		Liao WB et al. (2016) Am.Nat. 188:693-700
Anura	Bufonidae	Bufo	gargarizans		Bufo_gargarizans	1	m	Mass	33.203	66.24	0.0722	37.6	adult	Bufo_minshanicus	Liao WB et al. (2016) Am.Nat. 188:693-700
Anura	Bufonidae	Bufo	gargarizans		Bufo_gargarizans	1	m	Mass	36.9649	66.59	0.0594	29.07	adult	Bufo_minshanicus	Liao WB et al. (2016) Am.Nat. 188:693-700
Anura	Bufonidae	Bufo	gargarizans		Bufo_gargarizans	1	m	Mass	35.363	69.65	0.0561	23.08	adult	Bufo_minshanicus	Liao WB et al. (2016) Am.Nat. 188:693-700
Anura	Bufonidae	Bufo	melanostictus		Bufo_melanostictus	1	m	Mass	20.35	54.55	0.051636	25.96	adult		Zeng ZB et al. (2016) Ecol. Evol. 6:7070-7079	Used emprical data converting anuran brain volume to brain mass: mass (g) = 0.0016 * vol (mm3) + 0.0101, based on corresponding mass and volume data from Zeng et al (2016) and Liao et al. (2016)
Anura	Bufonidae	Bufo	tibetanus		Bufo_tibetanus	1	m	Mass	29.9413	64.36	0.050244	25.09	adult		Zeng ZB et al. (2016) Ecol. Evol. 6:7070-7079	Used emprical data converting anuran brain volume to brain mass: mass (g) = 0.0016 * vol (mm3) + 0.0101, based on corresponding mass and volume data from Zeng et al (2016) and Liao et al. (2016)
Anura	Bufonidae	Bufo	tibetanus		Bufo_tibetanus	1	m	Mass	13.1206	52.87	0.052724	26.64	adult		Zeng ZB et al. (2016) Ecol. Evol. 6:7070-7079	Used emprical data converting anuran brain volume to brain mass: mass (g) = 0.0016 * vol (mm3) + 0.0101, based on corresponding mass and volume data from Zeng et al (2016) and Liao et al. (2016)
Anura	Dicroglossidae	Chaparana	quadranus		Chaparana_quadranus	1	m	Mass	30.32	63.29	0.057236	29.46	adult	Chaparana_quadrana	Zeng ZB et al. (2016) Ecol. Evol. 6:7070-7079	Used emprical data converting anuran brain volume to brain mass: mass (g) = 0.0016 * vol (mm3) + 0.0101, based on corresponding mass and volume data from Zeng et al (2016) and Liao et al. (2016)
Anura	Dicroglossidae	Chaparana	quadranus		Chaparana_quadranus	1	m	Mass	47.66	74.58	0.065364	34.54	adult	Chaparana_quadrana	Zeng ZB et al. (2016) Ecol. Evol. 6:7070-7079	Used emprical data converting anuran brain volume to brain mass: mass (g) = 0.0016 * vol (mm3) + 0.0101, based on corresponding mass and volume data from Zeng et al (2016) and Liao et al. (2016)
Anura	Dicroglossidae	Chaparana	quadranus		Chaparana_quadranus	1	m	Mass	51.97	75.49	0.068964	36.79	adult	Chaparana_quadrana	Zeng ZB et al. (2016) Ecol. Evol. 6:7070-7079	Used emprical data converting anuran brain volume to brain mass: mass (g) = 0.0016 * vol (mm3) + 0.0101, based on corresponding mass and volume data from Zeng et al (2016) and Liao et al. (2016)
Anura	Dicroglossidae	Chaparana	quadranus		Chaparana_quadranus	1	m	Mass	33.6592	64.62	0.07716		adult	Chaparana_quadrana	Liao WB et al. (2016) Am.Nat. 188:693-700
Anura	Dicroglossidae	Chaparana	quadranus		Chaparana_quadranus	1	m	Mass	37.8951	66.36	0.0409		adult	Chaparana_quadrana	Liao WB et al. (2016) Am.Nat. 188:693-700
Anura	Dicroglossidae	Chaparana	quadranus		Chaparana_quadranus	1	m	Mass	53.3553	74.17	0.0485		adult	Chaparana_quadrana	Liao WB et al. (2016) Am.Nat. 188:693-700
Anura	Dicroglossidae	Fejervarya	limnocharis		Fejervarya_limnocharis	1	m	Mass	4.17	35.91	0.040228	18.83	adult		Zeng ZB et al. (2016) Ecol. Evol. 6:7070-7079	Used emprical data converting anuran brain volume to brain mass: mass (g) = 0.0016 * vol (mm3) + 0.0101, based on corresponding mass and volume data from Zeng et al (2016) and Liao et al. (2016)
Anura	Dicroglossidae	Fejervarya	limnocharis		Fejervarya_limnocharis	1	m	Mass	3.7257	34	0.040772	19.17	adult		Zeng ZB et al. (2016) Ecol. Evol. 6:7070-7079	Used emprical data converting anuran brain volume to brain mass: mass (g) = 0.0016 * vol (mm3) + 0.0101, based on corresponding mass and volume data from Zeng et al (2016) and Liao et al. (2016)
Anura	Dicroglossidae	Fejervarya	limnocharis		Fejervarya_limnocharis	1	m	Mass	5.72	41.03	0.042612	20.32	adult		Zeng ZB et al. (2016) Ecol. Evol. 6:7070-7079	Used emprical data converting anuran brain volume to brain mass: mass (g) = 0.0016 * vol (mm3) + 0.0101, based on corresponding mass and volume data from Zeng et al (2016) and Liao et al. (2016)
Anura	Dicroglossidae	Fejervarya	limnocharis		Fejervarya_limnocharis	1	m	Mass	5.48	39.85	0.044292	21.37	adult		Zeng ZB et al. (2016) Ecol. Evol. 6:7070-7079	Used emprical data converting anuran brain volume to brain mass: mass (g) = 0.0016 * vol (mm3) + 0.0101, based on corresponding mass and volume data from Zeng et al (2016) and Liao et al. (2016)
Anura	Dicroglossidae	Fejervarya	limnocharis		Fejervarya_limnocharis	1	m	Mass	6.28	39.71	0.051156	25.66	adult		Zeng ZB et al. (2016) Ecol. Evol. 6:7070-7079	Used emprical data converting anuran brain volume to brain mass: mass (g) = 0.0016 * vol (mm3) + 0.0101, based on corresponding mass and volume data from Zeng et al (2016) and Liao et al. (2016)
Anura	Dicroglossidae	Fejervarya	limnocharis		Fejervarya_limnocharis	1	m	Mass	3.2103	35.23	0.0294		adult		Liao WB et al. (2016) Am.Nat. 188:693-700
Anura	Dicroglossidae	Fejervarya	limnocharis		Fejervarya_limnocharis	1	m	Mass	3.9442	35.95	0.0312		adult		Liao WB et al. (2016) Am.Nat. 188:693-700
Anura	Dicroglossidae	Fejervarya	limnocharis		Fejervarya_limnocharis	1	m	Mass	3.5128	36.09	0.0314		adult		Liao WB et al. (2016) Am.Nat. 188:693-700
Anura	Dicroglossidae	Fejervarya	limnocharis		Fejervarya_limnocharis	1	m	Mass	3.5079	36.51	0.0263		adult		Liao WB et al. (2016) Am.Nat. 188:693-700
Anura	Dicroglossidae	Fejervarya	limnocharis		Fejervarya_limnocharis	1	m	Mass	4.4849	36.82	0.0395		adult		Liao WB et al. (2016) Am.Nat. 188:693-700
Anura	Dicroglossidae	Fejervarya	limnocharis		Fejervarya_limnocharis	1	m	Mass	4.4172	36.84	0.0325		adult		Liao WB et al. (2016) Am.Nat. 188:693-700
Anura	Dicroglossidae	Fejervarya	limnocharis		Fejervarya_limnocharis	1	m	Mass	4.5067	37.94	0.036		adult		Liao WB et al. (2016) Am.Nat. 188:693-700
Anura	Dicroglossidae	Fejervarya	limnocharis		Fejervarya_limnocharis	1	m	Mass	4.1263	38.1	0.0326		adult		Liao WB et al. (2016) Am.Nat. 188:693-700
Anura	Dicroglossidae	Fejervarya	limnocharis		Fejervarya_limnocharis	1	m	Mass	4.2401	38.68	0.0276		adult		Liao WB et al. (2016) Am.Nat. 188:693-700
Anura	Dicroglossidae	Fejervarya	limnocharis		Fejervarya_limnocharis	1	m	Mass	4.942	38.73	0.0331		adult		Liao WB et al. (2016) Am.Nat. 188:693-700
Anura	Dicroglossidae	Fejervarya	limnocharis		Fejervarya_limnocharis	1	m	Mass	4.7152	38.99	0.0278		adult		Liao WB et al. (2016) Am.Nat. 188:693-700
Anura	Dicroglossidae	Fejervarya	limnocharis		Fejervarya_limnocharis	1	m	Mass	4.0588	39.16	0.0304		adult		Liao WB et al. (2016) Am.Nat. 188:693-700
Anura	Dicroglossidae	Fejervarya	limnocharis		Fejervarya_limnocharis	1	m	Mass	4.2064	39.21	0.0306		adult		Liao WB et al. (2016) Am.Nat. 188:693-700
Anura	Dicroglossidae	Fejervarya	limnocharis		Fejervarya_limnocharis	1	m	Mass	4.9298	39.33	0.0272		adult		Liao WB et al. (2016) Am.Nat. 188:693-700
Anura	Dicroglossidae	Fejervarya	limnocharis		Fejervarya_limnocharis	1	m	Mass	4.8779	39.63	0.0277		adult		Liao WB et al. (2016) Am.Nat. 188:693-700
Anura	Dicroglossidae	Fejervarya	limnocharis		Fejervarya_limnocharis	1	m	Mass	4.8117	39.8	0.0342		adult		Liao WB et al. (2016) Am.Nat. 188:693-700
Anura	Dicroglossidae	Fejervarya	limnocharis		Fejervarya_limnocharis	1	m	Mass	4.6327	40.2	0.0386		adult		Liao WB et al. (2016) Am.Nat. 188:693-700
Anura	Dicroglossidae	Fejervarya	limnocharis		Fejervarya_limnocharis	1	m	Mass	4.8173	40.26	0.0315		adult		Liao WB et al. (2016) Am.Nat. 188:693-700
Anura	Dicroglossidae	Fejervarya	limnocharis		Fejervarya_limnocharis	1	m	Mass	5.2747	41.62	0.0322		adult		Liao WB et al. (2016) Am.Nat. 188:693-700
Anura	Dicroglossidae	Fejervarya	limnocharis		Fejervarya_limnocharis	1	m	Mass	4.956	41.68	0.0367		adult		Liao WB et al. (2016) Am.Nat. 188:693-700
Anura	Dicroglossidae	Nanorana	parkeri		Nanorana_parkeri	1	m	Mass	16.6	52.73	0.031204	13.19	adult		Zeng ZB et al. (2016) Ecol. Evol. 6:7070-7079	Used emprical data converting anuran brain volume to brain mass: mass (g) = 0.0016 * vol (mm3) + 0.0101, based on corresponding mass and volume data from Zeng et al (2016) and Liao et al. (2016)
Anura	Dicroglossidae	Nanorana	parkeri		Nanorana_parkeri	1	m	Mass	20.59	56.11	0.041316	19.51	adult		Zeng ZB et al. (2016) Ecol. Evol. 6:7070-7079	Used emprical data converting anuran brain volume to brain mass: mass (g) = 0.0016 * vol (mm3) + 0.0101, based on corresponding mass and volume data from Zeng et al (2016) and Liao et al. (2016)
Anura	Dicroglossidae	Nanorana	parkeri		Nanorana_parkeri	1	m	Mass	15.41	55.36	0.043524	20.89	adult		Zeng ZB et al. (2016) Ecol. Evol. 6:7070-7079	Used emprical data converting anuran brain volume to brain mass: mass (g) = 0.0016 * vol (mm3) + 0.0101, based on corresponding mass and volume data from Zeng et al (2016) and Liao et al. (2016)
Anura	Dicroglossidae	Nanorana	ventripunctata		Nanorana_ventripunctata	1	m	Mass	3.5654	34.56	0.0272		adult		Liao WB et al. (2016) Am.Nat. 188:693-700
Anura	Dicroglossidae	Nanorana	ventripunctata		Nanorana_ventripunctata	1	m	Mass	3.2043	35.54	0.0272		adult		Liao WB et al. (2016) Am.Nat. 188:693-700
Anura	Dicroglossidae	Nanorana	ventripunctata		Nanorana_ventripunctata	1	m	Mass	6.0058	36.36	0.027		adult		Liao WB et al. (2016) Am.Nat. 188:693-700
Anura	Dicroglossidae	Paa	boulengeri		Paa_boulengeri	1	m	Mass	32.8367	64.18	0.0207		adult		Liao WB et al. (2016) Am.Nat. 188:693-700
Anura	Dicroglossidae	Paa	boulengeri		Paa_boulengeri	1	m	Mass	42.7204	67.18	0.0755		adult		Liao WB et al. (2016) Am.Nat. 188:693-700
Anura	Dicroglossidae	Paa	boulengeri		Paa_boulengeri	1	m	Mass	62.739	79.78	0.0914		adult		Liao WB et al. (2016) Am.Nat. 188:693-700
Anura	Dicroglossidae	Paa	yunnanensis		Paa_yunnanensis	1	m	Mass	25.9095	55.75	0.0633		adult		Liao WB et al. (2016) Am.Nat. 188:693-700
Anura	Dicroglossidae	Paa	yunnanensis		Paa_yunnanensis	1	m	Mass	34.1368	65.37	0.0837		adult		Liao WB et al. (2016) Am.Nat. 188:693-700
Anura	Dicroglossidae	Paa	yunnanensis		Paa_yunnanensis	1	m	Mass	60.0763	74.79	0.0805		adult		Liao WB et al. (2016) Am.Nat. 188:693-700
Anura	Hylidae	Hyla	annectans	chuanxiensis	Hyla_annectans	1	m	Mass	2.7654	30.36	0.022836	7.96	adult		Zeng ZB et al. (2016) Ecol. Evol. 6:7070-7079	Used emprical data converting anuran brain volume to brain mass: mass (g) = 0.0016 * vol (mm3) + 0.0101, based on corresponding mass and volume data from Zeng et al (2016) and Liao et al. (2016)
Anura	Hylidae	Hyla	annectans	chuanxiensis	Hyla_annectans	1	m	Mass	3.5668	35.65	0.026228	10.08	adult		Zeng ZB et al. (2016) Ecol. Evol. 6:7070-7079	Used emprical data converting anuran brain volume to brain mass: mass (g) = 0.0016 * vol (mm3) + 0.0101, based on corresponding mass and volume data from Zeng et al (2016) and Liao et al. (2016)
Anura	Hylidae	Hyla	annectans	jingdongensis	Hyla_annectans	1	m	Mass	3.09	30.62	0.033076	14.36	adult		Zeng ZB et al. (2016) Ecol. Evol. 6:7070-7079	Used emprical data converting anuran brain volume to brain mass: mass (g) = 0.0016 * vol (mm3) + 0.0101, based on corresponding mass and volume data from Zeng et al (2016) and Liao et al. (2016)
Anura	Hylidae	Hyla	annectans	jingdongensis	Hyla_annectans	1	m	Mass	2.0363	29.88	0.022		adult		Liao WB et al. (2016) Am.Nat. 188:693-700
Anura	Hylidae	Hyla	annectans	jingdongensis	Hyla_annectans	1	m	Mass	2.6908	31.2	0.0277		adult		Liao WB et al. (2016) Am.Nat. 188:693-700
Anura	Hylidae	Hyla	annectans	jingdongensis	Hyla_annectans	1	m	Mass	1.4728	31.49	0.0207		adult		Liao WB et al. (2016) Am.Nat. 188:693-700
Anura	Hylidae	Hyla	annectans	jingdongensis	Hyla_annectans	1	m	Mass	2.7156	31.9	0.0209		adult		Liao WB et al. (2016) Am.Nat. 188:693-700
Anura	Hylidae	Hyla	annectans	jingdongensis	Hyla_annectans	1	m	Mass	1.7349	31.91	0.0241	10.6	adult		Liao WB et al. (2016) Am.Nat. 188:693-700
Anura	Hylidae	Hyla	annectans	jingdongensis	Hyla_annectans	1	m	Mass	2.021	31.91	0.0264		adult		Liao WB et al. (2016) Am.Nat. 188:693-700
Anura	Hylidae	Hyla	annectans	jingdongensis	Hyla_annectans	1	m	Mass	1.8594	32.6	0.0238	11.98	adult		Liao WB et al. (2016) Am.Nat. 188:693-700
Anura	Hylidae	Hyla	annectans	jingdongensis	Hyla_annectans	1	m	Mass	2.0433	32.69	0.025		adult		Liao WB et al. (2016) Am.Nat. 188:693-700
Anura	Hylidae	Hyla	annectans	jingdongensis	Hyla_annectans	1	m	Mass	2.2472	33.23	0.0448		adult		Liao WB et al. (2016) Am.Nat. 188:693-700
Anura	Hylidae	Hyla	annectans	jingdongensis	Hyla_annectans	1	m	Mass	2.7635	34.77	0.0229	12.34	adult		Liao WB et al. (2016) Am.Nat. 188:693-700
Anura	Hylidae	Hyla	annectans	jingdongensis	Hyla_annectans	1	m	Mass	1.3746	34.85	0.018		adult		Liao WB et al. (2016) Am.Nat. 188:693-700
Anura	Hylidae	Hyla	annectans	jingdongensis	Hyla_annectans	1	m	Mass	3.1626	35.4	0.0241		adult		Liao WB et al. (2016) Am.Nat. 188:693-700
Anura	Hylidae	Hyla	annectans	jingdongensis	Hyla_annectans	1	m	Mass	2.0261	35.52	0.0202	11.48	adult		Liao WB et al. (2016) Am.Nat. 188:693-700
Anura	Hylidae	Hyla	annectans	jingdongensis	Hyla_annectans	1	m	Mass	2.8309	35.65	0.0301		adult		Liao WB et al. (2016) Am.Nat. 188:693-700
Anura	Hylidae	Hyla	annectans	jingdongensis	Hyla_annectans	1	m	Mass	1.463	35.82	0.0225	10.55	adult		Liao WB et al. (2016) Am.Nat. 188:693-700
Anura	Hylidae	Hyla	annectans	jingdongensis	Hyla_annectans	1	m	Mass	2.9667	35.96	0.0272		adult		Liao WB et al. (2016) Am.Nat. 188:693-700
Anura	Hylidae	Hyla	annectans	jingdongensis	Hyla_annectans	1	m	Mass	2.6664	36.33	0.0267		adult		Liao WB et al. (2016) Am.Nat. 188:693-700
Anura	Hylidae	Hyla	arborea		Hyla_arborea	1	unknown	Mass	4.8		0.043		unknown		Dubois E (1913) On the relation between the quantity of brain and the size of the body in vertebrates
Anura	Hylidae	Hyla	tsinlingensis		Hyla_tsinlingensis	1	m	Mass	2.1187	31.56	0.0129	8.31	adult		Liao WB et al. (2016) Am.Nat. 188:693-700
Anura	Hylidae	Hyla	tsinlingensis		Hyla_tsinlingensis	1	m	Mass	2.0597	31.73	0.0125	7.71	adult		Liao WB et al. (2016) Am.Nat. 188:693-700
Anura	Hylidae	Hyla	tsinlingensis		Hyla_tsinlingensis	1	m	Mass	2.7523	33.02	0.0126	7.95	adult		Liao WB et al. (2016) Am.Nat. 188:693-700
Anura	Leptodactylidae	Leptodactylus	fuscus		Leptodactylus_fuscus	1	unknown	Mass	53		0.088		unknown	Rana fusca	Dubois E (1913) On the relation between the quantity of brain and the size of the body in vertebrates
Anura	Megophryidae	Oreolalax	rugosus		Oreolalax_rugosus	1	m	Mass	9.4493	52.68	0.063796	33.56	adult		Zeng ZB et al. (2016) Ecol. Evol. 6:7070-7079	Used emprical data converting anuran brain volume to brain mass: mass (g) = 0.0016 * vol (mm3) + 0.0101, based on corresponding mass and volume data from Zeng et al (2016) and Liao et al. (2016)
Anura	Megophryidae	Scutiger	muliensis		Scutiger_muliensis	1	m	Mass	33.1804	62.96	0.064276	33.86	adult		Zeng ZB et al. (2016) Ecol. Evol. 6:7070-7079	Used emprical data converting anuran brain volume to brain mass: mass (g) = 0.0016 * vol (mm3) + 0.0101, based on corresponding mass and volume data from Zeng et al (2016) and Liao et al. (2016)
Anura	Megophryidae	Scutiger	muliensis		Scutiger_muliensis	1	m	Mass	25.8572	62.09	0.083188	45.68	adult		Zeng ZB et al. (2016) Ecol. Evol. 6:7070-7079	Used emprical data converting anuran brain volume to brain mass: mass (g) = 0.0016 * vol (mm3) + 0.0101, based on corresponding mass and volume data from Zeng et al (2016) and Liao et al. (2016)
Anura	Megophryidae	Xenophrys	shapingensis		Xenophrys_shapingensis	1	m	Mass	28.6638	70.45	0.045188	21.93	adult	Megophrys_shapingensis	Zeng ZB et al. (2016) Ecol. Evol. 6:7070-7079	Used emprical data converting anuran brain volume to brain mass: mass (g) = 0.0016 * vol (mm3) + 0.0101, based on corresponding mass and volume data from Zeng et al (2016) and Liao et al. (2016)
Anura	Megophryidae	Xenophrys	shapingensis		Xenophrys_shapingensis	1	m	Mass	31.2247	74.71	0.047156	23.16	adult	Megophrys_shapingensis	Zeng ZB et al. (2016) Ecol. Evol. 6:7070-7079	Used emprical data converting anuran brain volume to brain mass: mass (g) = 0.0016 * vol (mm3) + 0.0101, based on corresponding mass and volume data from Zeng et al (2016) and Liao et al. (2016)
Anura	Microhylidae	Kaloula	pulchra		Kaloula_pulchra	1	m	Mass	3.59	32.13	0.0113		adult	Kaloula_rugifera	Liao WB et al. (2016) Am.Nat. 188:693-700
Anura	Microhylidae	Kaloula	pulchra		Kaloula_pulchra	1	m	Mass	6.8537	37.6	0.0188		adult	Kaloula_rugifera	Liao WB et al. (2016) Am.Nat. 188:693-700
Anura	Microhylidae	Kaloula	pulchra		Kaloula_pulchra	1	m	Mass	8.2822	40.21	0.021		adult	Kaloula_rugifera	Liao WB et al. (2016) Am.Nat. 188:693-700
Anura	Microhylidae	Kaloula	pulchra		Kaloula_pulchra	1	m	Mass	4.0613	36.06	0.0416		adult	Kaloula_verrucosa	Liao WB et al. (2016) Am.Nat. 188:693-700
Anura	Microhylidae	Kaloula	pulchra		Kaloula_pulchra	1	m	Mass	4.8675	36.59	0.0442		adult	Kaloula_verrucosa	Liao WB et al. (2016) Am.Nat. 188:693-700
Anura	Microhylidae	Kaloula	pulchra		Kaloula_pulchra	1	m	Mass	6.737	36.66	0.0357	19.59	adult	Kaloula_verrucosa	Liao WB et al. (2016) Am.Nat. 188:693-700
Anura	Microhylidae	Kaloula	pulchra		Kaloula_pulchra	1	m	Mass	4.8	36.69	0.0315		adult	Kaloula_verrucosa	Liao WB et al. (2016) Am.Nat. 188:693-700
Anura	Microhylidae	Kaloula	pulchra		Kaloula_pulchra	1	m	Mass	5.4804	37.46	0.0328	17.41	adult	Kaloula_verrucosa	Liao WB et al. (2016) Am.Nat. 188:693-700
Anura	Microhylidae	Kaloula	pulchra		Kaloula_pulchra	1	m	Mass	6.0414	37.5	0.0319		adult	Kaloula_verrucosa	Liao WB et al. (2016) Am.Nat. 188:693-700
Anura	Microhylidae	Kaloula	pulchra		Kaloula_pulchra	1	m	Mass	5.7512	37.68	0.0375		adult	Kaloula_verrucosa	Liao WB et al. (2016) Am.Nat. 188:693-700
Anura	Microhylidae	Kaloula	pulchra		Kaloula_pulchra	1	m	Mass	5.3165	38.5	0.0459		adult	Kaloula_verrucosa	Liao WB et al. (2016) Am.Nat. 188:693-700
Anura	Microhylidae	Kaloula	pulchra		Kaloula_pulchra	1	m	Mass	5.028	38.82	0.036		adult	Kaloula_verrucosa	Liao WB et al. (2016) Am.Nat. 188:693-700
Anura	Microhylidae	Kaloula	pulchra		Kaloula_pulchra	1	m	Mass	6.0344	39.41	0.0388	20.97	adult	Kaloula_verrucosa	Liao WB et al. (2016) Am.Nat. 188:693-700
Anura	Microhylidae	Kaloula	pulchra		Kaloula_pulchra	1	m	Mass	5.4047	39.56	0.0368		adult	Kaloula_verrucosa	Liao WB et al. (2016) Am.Nat. 188:693-700
Anura	Microhylidae	Kaloula	pulchra		Kaloula_pulchra	1	m	Mass	6.0405	40.96	0.0392	17.92	adult	Kaloula_verrucosa	Liao WB et al. (2016) Am.Nat. 188:693-700
Anura	Microhylidae	Kaloula	pulchra		Kaloula_pulchra	1	m	Mass	7.9516	41.43	0.0539	24.19	adult	Kaloula_verrucosa	Liao WB et al. (2016) Am.Nat. 188:693-700
Anura	Microhylidae	Kaloula	pulchra		Kaloula_pulchra	1	m	Mass	6.9394	41.72	0.0524		adult	Kaloula_verrucosa	Liao WB et al. (2016) Am.Nat. 188:693-700
Anura	Microhylidae	Microhyla	ornata		Microhyla_ornata	1	m	Mass	0.6655	20.93	0.016548	4.03	adult		Zeng ZB et al. (2016) Ecol. Evol. 6:7070-7079	Used emprical data converting anuran brain volume to brain mass: mass (g) = 0.0016 * vol (mm3) + 0.0101, based on corresponding mass and volume data from Zeng et al (2016) and Liao et al. (2016)
Anura	Microhylidae	Microhyla	ornata		Microhyla_ornata	1	m	Mass	0.6238	19.69	0.017876	4.86	adult		Zeng ZB et al. (2016) Ecol. Evol. 6:7070-7079	Used emprical data converting anuran brain volume to brain mass: mass (g) = 0.0016 * vol (mm3) + 0.0101, based on corresponding mass and volume data from Zeng et al (2016) and Liao et al. (2016)
Anura	Microhylidae	Microhyla	ornata		Microhyla_ornata	1	m	Mass	0.9052	21.55	0.018404	5.19	adult		Zeng ZB et al. (2016) Ecol. Evol. 6:7070-7079	Used emprical data converting anuran brain volume to brain mass: mass (g) = 0.0016 * vol (mm3) + 0.0101, based on corresponding mass and volume data from Zeng et al (2016) and Liao et al. (2016)
Anura	Microhylidae	Microhyla	ornata		Microhyla_ornata	1	m	Mass	0.7447	20.31	0.018916	5.51	adult		Zeng ZB et al. (2016) Ecol. Evol. 6:7070-7079	Used emprical data converting anuran brain volume to brain mass: mass (g) = 0.0016 * vol (mm3) + 0.0101, based on corresponding mass and volume data from Zeng et al (2016) and Liao et al. (2016)
Anura	Ranidae	Amolops	granulosus		Amolops_granulosus	1	m	Mass	2.2138	32.58	0.031492	13.37	adult		Zeng ZB et al. (2016) Ecol. Evol. 6:7070-7079	Used emprical data converting anuran brain volume to brain mass: mass (g) = 0.0016 * vol (mm3) + 0.0101, based on corresponding mass and volume data from Zeng et al (2016) and Liao et al. (2016)
Anura	Ranidae	Amolops	lifanensis		Amolops_lifanensis	1	m	Mass	13.72	49.56	0.045108	21.88	adult		Zeng ZB et al. (2016) Ecol. Evol. 6:7070-7079	Used emprical data converting anuran brain volume to brain mass: mass (g) = 0.0016 * vol (mm3) + 0.0101, based on corresponding mass and volume data from Zeng et al (2016) and Liao et al. (2016)
Anura	Ranidae	Amolops	lifanensis		Amolops_lifanensis	1	m	Mass	16.22	54.92	0.061476	32.11	adult		Zeng ZB et al. (2016) Ecol. Evol. 6:7070-7079	Used emprical data converting anuran brain volume to brain mass: mass (g) = 0.0016 * vol (mm3) + 0.0101, based on corresponding mass and volume data from Zeng et al (2016) and Liao et al. (2016)
Anura	Ranidae	Amolops	lifanensis		Amolops_lifanensis	1	m	Mass	13.13	53.82	0.062164	32.54	adult		Zeng ZB et al. (2016) Ecol. Evol. 6:7070-7079	Used emprical data converting anuran brain volume to brain mass: mass (g) = 0.0016 * vol (mm3) + 0.0101, based on corresponding mass and volume data from Zeng et al (2016) and Liao et al. (2016)
Anura	Ranidae	Amolops	lifanensis		Amolops_lifanensis	1	m	Mass	13.3808	49.34	0.032		adult		Liao WB et al. (2016) Am.Nat. 188:693-700
Anura	Ranidae	Amolops	lifanensis		Amolops_lifanensis	1	m	Mass	17.7332	49.84	0.0354		adult		Liao WB et al. (2016) Am.Nat. 188:693-700
Anura	Ranidae	Amolops	lifanensis		Amolops_lifanensis	1	m	Mass	14.9906	51.72	0.0425		adult		Liao WB et al. (2016) Am.Nat. 188:693-700
Anura	Ranidae	Amolops	lifanensis		Amolops_lifanensis	1	m	Mass	17.5768	54.86	0.0416		adult		Liao WB et al. (2016) Am.Nat. 188:693-700
Anura	Ranidae	Amolops	loloensis		Amolops_loloensis	1	m	Mass	19.8348	51.62	0.0491	33.85	adult		Liao WB et al. (2016) Am.Nat. 188:693-700
Anura	Ranidae	Amolops	loloensis		Amolops_loloensis	1	m	Mass	17.3708	53.2	0.0585	37.77	adult		Liao WB et al. (2016) Am.Nat. 188:693-700
Anura	Ranidae	Amolops	loloensis		Amolops_loloensis	1	m	Mass	33.3139	63.63	0.0341		adult		Liao WB et al. (2016) Am.Nat. 188:693-700
Anura	Ranidae	Amolops	mantzorum		Amolops_mantzorum	1	m	Mass	9.97	46.75	0.0564		adult		Liao WB et al. (2016) Am.Nat. 188:693-700
Anura	Ranidae	Amolops	mantzorum		Amolops_mantzorum	1	m	Mass	10.95	47.03	0.0542		adult		Liao WB et al. (2016) Am.Nat. 188:693-700
Anura	Ranidae	Amolops	mantzorum		Amolops_mantzorum	1	m	Mass	9.81	48.33	0.0436		adult		Liao WB et al. (2016) Am.Nat. 188:693-700
Anura	Ranidae	Amolops	mantzorum		Amolops_mantzorum	1	m	Mass	10.34	48.54	0.0725		adult		Liao WB et al. (2016) Am.Nat. 188:693-700
Anura	Ranidae	Amolops	mantzorum		Amolops_mantzorum	1	m	Mass	13.25	48.93	0.0652		adult		Liao WB et al. (2016) Am.Nat. 188:693-700
Anura	Ranidae	Amolops	mantzorum		Amolops_mantzorum	1	m	Mass	12.38	49.53	0.0613		adult		Liao WB et al. (2016) Am.Nat. 188:693-700
Anura	Ranidae	Amolops	mantzorum		Amolops_mantzorum	1	m	Mass	14.32	49.75	0.0787		adult		Liao WB et al. (2016) Am.Nat. 188:693-700
Anura	Ranidae	Amolops	mantzorum		Amolops_mantzorum	1	m	Mass	12.52	50.36	0.0737		adult		Liao WB et al. (2016) Am.Nat. 188:693-700
Anura	Ranidae	Amolops	mantzorum		Amolops_mantzorum	1	m	Mass	14.9	50.7	0.0692		adult		Liao WB et al. (2016) Am.Nat. 188:693-700
Anura	Ranidae	Amolops	mantzorum		Amolops_mantzorum	1	m	Mass	14.64	51.29	0.0664	30.64	adult		Liao WB et al. (2016) Am.Nat. 188:693-700
Anura	Ranidae	Amolops	mantzorum		Amolops_mantzorum	1	m	Mass	11.92	52.41	0.0499	33.8	adult		Liao WB et al. (2016) Am.Nat. 188:693-700
Anura	Ranidae	Amolops	mantzorum		Amolops_mantzorum	1	m	Mass	14.88	52.76	0.093	25.67	adult		Liao WB et al. (2016) Am.Nat. 188:693-700
Anura	Ranidae	Amolops	mantzorum		Amolops_mantzorum	1	m	Mass	15.12	57.07	0.0686	21.51	adult		Liao WB et al. (2016) Am.Nat. 188:693-700
Anura	Ranidae	Amolops	mantzorum		Amolops_mantzorum	1	m	Mass	13.62	57.3	0.0725	23.16	adult		Liao WB et al. (2016) Am.Nat. 188:693-700
Anura	Ranidae	Amolops	mantzorum		Amolops_mantzorum	1	m	Mass	14.32	59.1	0.0684	36.07	adult		Liao WB et al. (2016) Am.Nat. 188:693-700
Anura	Ranidae	Rana	adenopleura		Rana_adenopleura	1	m	Mass	9.0444	43.32	0.0442		adult		Liao WB et al. (2016) Am.Nat. 188:693-700	Also documented as Hylarana daunchina in Zeng 2016
Anura	Ranidae	Rana	adenopleura		Rana_adenopleura	1	m	Mass	9.0413	43.88	0.036		adult		Liao WB et al. (2016) Am.Nat. 188:693-700	Also documented as Hylarana daunchina in Zeng 2016
Anura	Ranidae	Rana	adenopleura		Rana_adenopleura	1	m	Mass	9.5342	43.89	0.0362		adult		Liao WB et al. (2016) Am.Nat. 188:693-700	Also documented as Hylarana daunchina in Zeng 2016
Anura	Ranidae	Rana	areolata		Rana_areolata	5	unknown	Mass	73.35		0.153		unknown	Rana virescens	Dubois E (1913) On the relation between the quantity of brain and the size of the body in vertebrates
Anura	Ranidae	Rana	catesbeiana		Rana_catesbeiana	6	m	Mass	519.9		0.4625		unknown	Rana_catesbeianus	Crile G and Quiring DP (1940) Ohio J Sci 40:219-259.	Louisiana
Anura	Ranidae	Rana	catesbeiana		Rana_catesbeiana	6	unknown	Mass	244.4		0.204		unknown	Rana catesbyana	Dubois E (1913) On the relation between the quantity of brain and the size of the body in vertebrates
Anura	Ranidae	Rana	chaochiaoensis		Rana_chaochiaoensis	1	m	Mass	3.893	39.63	0.0464		adult		Liao WB et al. (2016) Am.Nat. 188:693-700
Anura	Ranidae	Rana	chaochiaoensis		Rana_chaochiaoensis	1	m	Mass	4.3645	40.45	0.0486	16.4	adult		Liao WB et al. (2016) Am.Nat. 188:693-700
Anura	Ranidae	Rana	chaochiaoensis		Rana_chaochiaoensis	1	m	Mass	5.9496	44.71	0.0495		adult		Liao WB et al. (2016) Am.Nat. 188:693-700
Anura	Ranidae	Rana	chaochiaoensis		Rana_chaochiaoensis	1	m	Mass	5.884	44.75	0.0453	17.04	adult		Liao WB et al. (2016) Am.Nat. 188:693-700
Anura	Ranidae	Rana	chaochiaoensis		Rana_chaochiaoensis	1	m	Mass	7.7912	44.98	0.0468		adult		Liao WB et al. (2016) Am.Nat. 188:693-700
Anura	Ranidae	Rana	chaochiaoensis		Rana_chaochiaoensis	1	m	Mass	7.8233	46.54	0.0589		adult		Liao WB et al. (2016) Am.Nat. 188:693-700
Anura	Ranidae	Rana	chaochiaoensis		Rana_chaochiaoensis	1	m	Mass	7.1262	46.7	0.0484		adult		Liao WB et al. (2016) Am.Nat. 188:693-700
Anura	Ranidae	Rana	chaochiaoensis		Rana_chaochiaoensis	1	m	Mass	11.0663	52.75	0.0667	21.82	adult		Liao WB et al. (2016) Am.Nat. 188:693-700
Anura	Ranidae	Rana	chaochiaoensis		Rana_chaochiaoensis	1	m	Mass	9.6576	52.96	0.0521	24.04	adult		Liao WB et al. (2016) Am.Nat. 188:693-700
Anura	Ranidae	Rana	chaochiaoensis		Rana_chaochiaoensis	1	m	Mass	9.9431	53.2	0.0477	22.4	adult		Liao WB et al. (2016) Am.Nat. 188:693-700
Anura	Ranidae	Rana	esculenta		Rana_esculenta	1	unknown	Mass	44.5		0.106		unknown		Dubois E (1913) On the relation between the quantity of brain and the size of the body in vertebrates
Anura	Ranidae	Rana	grahami		Rana_grahami	1	m	Mass	11.6185	55.63	0.095268	53.23	adult	Odorrana_grahami	Zeng ZB et al. (2016) Ecol. Evol. 6:7070-7079	Used emprical data converting anuran brain volume to brain mass: mass (g) = 0.0016 * vol (mm3) + 0.0101, based on corresponding mass and volume data from Zeng et al (2016) and Liao et al. (2016)
Anura	Ranidae	Rana	grahami		Rana_grahami	1	m	Mass	24.4854	64.81	0.098756	55.41	adult	Odorrana_grahami	Zeng ZB et al. (2016) Ecol. Evol. 6:7070-7079	Used emprical data converting anuran brain volume to brain mass: mass (g) = 0.0016 * vol (mm3) + 0.0101, based on corresponding mass and volume data from Zeng et al (2016) and Liao et al. (2016)
Anura	Ranidae	Rana	grahami		Rana_grahami	1	m	Mass	33.9464	73.61	0.109204	61.94	adult	Odorrana_grahami	Zeng ZB et al. (2016) Ecol. Evol. 6:7070-7079	Used emprical data converting anuran brain volume to brain mass: mass (g) = 0.0016 * vol (mm3) + 0.0101, based on corresponding mass and volume data from Zeng et al (2016) and Liao et al. (2016)
Anura	Ranidae	Rana	grahami		Rana_grahami	1	m	Mass	30.876	69.91	0.114436	65.21	adult	Odorrana_grahami	Zeng ZB et al. (2016) Ecol. Evol. 6:7070-7079	Used emprical data converting anuran brain volume to brain mass: mass (g) = 0.0016 * vol (mm3) + 0.0101, based on corresponding mass and volume data from Zeng et al (2016) and Liao et al. (2016)
Anura	Ranidae	Rana	grahami		Rana_grahami	1	m	Mass	13.1371	55.08	0.0584		adult	Odorrana_grahami	Liao WB et al. (2016) Am.Nat. 188:693-700
Anura	Ranidae	Rana	grahami		Rana_grahami	1	m	Mass	14.7442	58.24	0.0603		adult	Odorrana_grahami	Liao WB et al. (2016) Am.Nat. 188:693-700
Anura	Ranidae	Rana	grahami		Rana_grahami	1	m	Mass	35.3477	74.42	0.1158		adult	Odorrana_grahami	Liao WB et al. (2016) Am.Nat. 188:693-700
Anura	Ranidae	Rana	grahami		Rana_grahami	1	m	Mass	40.0472	76.1	0.1229	47.74	adult	Odorrana_grahami	Liao WB et al. (2016) Am.Nat. 188:693-700
Anura	Ranidae	Rana	grahami		Rana_grahami	1	m	Mass	25.5952	66.96	0.1167	51.29	adult	Odorrana_grahami	Zeng ZB et al. (2016) Ecol. Evol. 6:7070-7079
Anura	Ranidae	Rana	grahami		Rana_grahami	1	m	Mass	25.5764	66.32	0.098	56	adult	Odorrana_grahami	Zeng ZB et al. (2016) Ecol. Evol. 6:7070-7079
Anura	Ranidae	Rana	guentheri		Rana_guentheri	1	m	Mass	16.7	62.57	0.05306	26.85	adult	Hylarana_guentheri	Zeng ZB et al. (2016) Ecol. Evol. 6:7070-7079	Used emprical data converting anuran brain volume to brain mass: mass (g) = 0.0016 * vol (mm3) + 0.0101, based on corresponding mass and volume data from Zeng et al (2016) and Liao et al. (2016)
Anura	Ranidae	Rana	guentheri		Rana_guentheri	1	m	Mass	19.04	65.17	0.055412	28.32	adult	Hylarana_guentheri	Zeng ZB et al. (2016) Ecol. Evol. 6:7070-7079	Used emprical data converting anuran brain volume to brain mass: mass (g) = 0.0016 * vol (mm3) + 0.0101, based on corresponding mass and volume data from Zeng et al (2016) and Liao et al. (2016)
Anura	Ranidae	Rana	guentheri		Rana_guentheri	1	m	Mass	21.75	64.97	0.06026	31.35	adult	Hylarana_guentheri	Zeng ZB et al. (2016) Ecol. Evol. 6:7070-7079	Used emprical data converting anuran brain volume to brain mass: mass (g) = 0.0016 * vol (mm3) + 0.0101, based on corresponding mass and volume data from Zeng et al (2016) and Liao et al. (2016)
Anura	Ranidae	Rana	guentheri		Rana_guentheri	1	m	Mass	24.31	65.86	0.063588	33.43	adult	Hylarana_guentheri	Zeng ZB et al. (2016) Ecol. Evol. 6:7070-7079	Used emprical data converting anuran brain volume to brain mass: mass (g) = 0.0016 * vol (mm3) + 0.0101, based on corresponding mass and volume data from Zeng et al (2016) and Liao et al. (2016)
Anura	Ranidae	Rana	guentheri		Rana_guentheri	1	m	Mass	19.55	60.3	0.065092	34.37	adult	Hylarana_guentheri	Zeng ZB et al. (2016) Ecol. Evol. 6:7070-7079	Used emprical data converting anuran brain volume to brain mass: mass (g) = 0.0016 * vol (mm3) + 0.0101, based on corresponding mass and volume data from Zeng et al (2016) and Liao et al. (2016)
Anura	Ranidae	Rana	guentheri		Rana_guentheri	1	m	Mass	16.28	58.19	0.066996	35.56	adult	Hylarana_guentheri	Zeng ZB et al. (2016) Ecol. Evol. 6:7070-7079	Used emprical data converting anuran brain volume to brain mass: mass (g) = 0.0016 * vol (mm3) + 0.0101, based on corresponding mass and volume data from Zeng et al (2016) and Liao et al. (2016)
Anura	Ranidae	Rana	guentheri		Rana_guentheri	1	m	Mass	22.19	64.02	0.071684	38.49	adult	Hylarana_guentheri	Zeng ZB et al. (2016) Ecol. Evol. 6:7070-7079	Used emprical data converting anuran brain volume to brain mass: mass (g) = 0.0016 * vol (mm3) + 0.0101, based on corresponding mass and volume data from Zeng et al (2016) and Liao et al. (2016)
Anura	Ranidae	Rana	guentheri		Rana_guentheri	1	m	Mass	21.72	66.17	0.072548	39.03	adult	Hylarana_guentheri	Zeng ZB et al. (2016) Ecol. Evol. 6:7070-7079	Used emprical data converting anuran brain volume to brain mass: mass (g) = 0.0016 * vol (mm3) + 0.0101, based on corresponding mass and volume data from Zeng et al (2016) and Liao et al. (2016)
Anura	Ranidae	Rana	guentheri		Rana_guentheri	1	m	Mass	22.39	66.91	0.073476	39.61	adult	Hylarana_guentheri	Zeng ZB et al. (2016) Ecol. Evol. 6:7070-7079	Used emprical data converting anuran brain volume to brain mass: mass (g) = 0.0016 * vol (mm3) + 0.0101, based on corresponding mass and volume data from Zeng et al (2016) and Liao et al. (2016)
Anura	Ranidae	Rana	guentheri		Rana_guentheri	1	m	Mass	20.32	64.83	0.075028	40.58	adult	Hylarana_guentheri	Zeng ZB et al. (2016) Ecol. Evol. 6:7070-7079	Used emprical data converting anuran brain volume to brain mass: mass (g) = 0.0016 * vol (mm3) + 0.0101, based on corresponding mass and volume data from Zeng et al (2016) and Liao et al. (2016)
Anura	Ranidae	Rana	guentheri		Rana_guentheri	1	m	Mass	20.28	66.22	0.078244	42.59	adult	Hylarana_guentheri	Zeng ZB et al. (2016) Ecol. Evol. 6:7070-7079	Used emprical data converting anuran brain volume to brain mass: mass (g) = 0.0016 * vol (mm3) + 0.0101, based on corresponding mass and volume data from Zeng et al (2016) and Liao et al. (2016)
Anura	Ranidae	Rana	guentheri		Rana_guentheri	1	m	Mass	21.31	62.24	0.07898	43.05	adult	Hylarana_guentheri	Zeng ZB et al. (2016) Ecol. Evol. 6:7070-7079	Used emprical data converting anuran brain volume to brain mass: mass (g) = 0.0016 * vol (mm3) + 0.0101, based on corresponding mass and volume data from Zeng et al (2016) and Liao et al. (2016)
Anura	Ranidae	Rana	guentheri		Rana_guentheri	1	m	Mass	23.03	68.53	0.07898	43.05	adult	Hylarana_guentheri	Zeng ZB et al. (2016) Ecol. Evol. 6:7070-7079	Used emprical data converting anuran brain volume to brain mass: mass (g) = 0.0016 * vol (mm3) + 0.0101, based on corresponding mass and volume data from Zeng et al (2016) and Liao et al. (2016)
Anura	Ranidae	Rana	guentheri		Rana_guentheri	1	m	Mass	15.75	56.27	0.083012	45.57	adult	Hylarana_guentheri	Zeng ZB et al. (2016) Ecol. Evol. 6:7070-7079	Used emprical data converting anuran brain volume to brain mass: mass (g) = 0.0016 * vol (mm3) + 0.0101, based on corresponding mass and volume data from Zeng et al (2016) and Liao et al. (2016)
Anura	Ranidae	Rana	guentheri		Rana_guentheri	1	m	Mass	22.08	65.7	0.08306	45.6	adult	Hylarana_guentheri	Zeng ZB et al. (2016) Ecol. Evol. 6:7070-7079	Used emprical data converting anuran brain volume to brain mass: mass (g) = 0.0016 * vol (mm3) + 0.0101, based on corresponding mass and volume data from Zeng et al (2016) and Liao et al. (2016)
Anura	Ranidae	Rana	guentheri		Rana_guentheri	1	m	Mass	18.66	64.05	0.085604	47.19	adult	Hylarana_guentheri	Zeng ZB et al. (2016) Ecol. Evol. 6:7070-7079	Used emprical data converting anuran brain volume to brain mass: mass (g) = 0.0016 * vol (mm3) + 0.0101, based on corresponding mass and volume data from Zeng et al (2016) and Liao et al. (2016)
Anura	Ranidae	Rana	guentheri		Rana_guentheri	1	m	Mass	18.9	62.24	0.085812	47.32	adult	Hylarana_guentheri	Zeng ZB et al. (2016) Ecol. Evol. 6:7070-7079	Used emprical data converting anuran brain volume to brain mass: mass (g) = 0.0016 * vol (mm3) + 0.0101, based on corresponding mass and volume data from Zeng et al (2016) and Liao et al. (2016)
Anura	Ranidae	Rana	guentheri		Rana_guentheri	1	m	Mass	28.02	69.37	0.095476	53.36	adult	Hylarana_guentheri	Zeng ZB et al. (2016) Ecol. Evol. 6:7070-7079	Used emprical data converting anuran brain volume to brain mass: mass (g) = 0.0016 * vol (mm3) + 0.0101, based on corresponding mass and volume data from Zeng et al (2016) and Liao et al. (2016)
Anura	Ranidae	Rana	guentheri		Rana_guentheri	1	m	Mass	17.68	62.38	0.0678		adult	Hylarana_guentheri	Liao WB et al. (2016) Am.Nat. 188:693-700
Anura	Ranidae	Rana	guentheri		Rana_guentheri	1	m	Mass	20.3	62.76	0.0703		adult	Hylarana_guentheri	Liao WB et al. (2016) Am.Nat. 188:693-700
Anura	Ranidae	Rana	guentheri		Rana_guentheri	1	m	Mass	17.5	62.9	0.0705		adult	Hylarana_guentheri	Liao WB et al. (2016) Am.Nat. 188:693-700
Anura	Ranidae	Rana	guentheri		Rana_guentheri	1	m	Mass	20.89	62.98	0.0878	39.76	adult	Hylarana_guentheri	Liao WB et al. (2016) Am.Nat. 188:693-700
Anura	Ranidae	Rana	guentheri		Rana_guentheri	1	m	Mass	20.05	63.18	0.0816	54.85	adult	Hylarana_guentheri	Liao WB et al. (2016) Am.Nat. 188:693-700
Anura	Ranidae	Rana	guentheri		Rana_guentheri	1	m	Mass	19.61	63.25	0.0707		adult	Hylarana_guentheri	Liao WB et al. (2016) Am.Nat. 188:693-700
Anura	Ranidae	Rana	guentheri		Rana_guentheri	1	m	Mass	18.8	63.25	0.0854		adult	Hylarana_guentheri	Liao WB et al. (2016) Am.Nat. 188:693-700
Anura	Ranidae	Rana	guentheri		Rana_guentheri	1	m	Mass	18.49	63.33	0.0727		adult	Hylarana_guentheri	Liao WB et al. (2016) Am.Nat. 188:693-700
Anura	Ranidae	Rana	guentheri		Rana_guentheri	1	m	Mass	18.31	63.66	0.0701		adult	Hylarana_guentheri	Liao WB et al. (2016) Am.Nat. 188:693-700
Anura	Ranidae	Rana	guentheri		Rana_guentheri	1	m	Mass	23.91	65.73	0.0863		adult	Hylarana_guentheri	Liao WB et al. (2016) Am.Nat. 188:693-700
Anura	Ranidae	Rana	guentheri		Rana_guentheri	1	m	Mass	20.68	66.68	0.086		adult	Hylarana_guentheri	Liao WB et al. (2016) Am.Nat. 188:693-700
Anura	Ranidae	Rana	guentheri		Rana_guentheri	1	m	Mass	21.37	66.84	0.087		adult	Hylarana_guentheri	Liao WB et al. (2016) Am.Nat. 188:693-700
Anura	Ranidae	Rana	guentheri		Rana_guentheri	1	m	Mass	24.18	68.76	0.0821		adult	Hylarana_guentheri	Liao WB et al. (2016) Am.Nat. 188:693-700
Anura	Ranidae	Rana	hejiangensis		Rana_hejiangensis	1	m	Mass	6.7872	44.48	0.0417	20.07	adult	Odorrana_hejiangensis	Liao WB et al. (2016) Am.Nat. 188:693-700
Anura	Ranidae	Rana	hejiangensis		Rana_hejiangensis	1	m	Mass	7.163	46.78	0.0359	18.49	adult	Odorrana_hejiangensis	Liao WB et al. (2016) Am.Nat. 188:693-700
Anura	Ranidae	Rana	hejiangensis		Rana_hejiangensis	1	m	Mass	8.4073	48.38	0.0436	23.66	adult	Odorrana_hejiangensis	Liao WB et al. (2016) Am.Nat. 188:693-700
Anura	Ranidae	Rana	japonica		Rana_japonica	1	m	Mass	21.9442	57.37	0.038004	17.44	adult		Zeng ZB et al. (2016) Ecol. Evol. 6:7070-7079	Used emprical data converting anuran brain volume to brain mass: mass (g) = 0.0016 * vol (mm3) + 0.0101, based on corresponding mass and volume data from Zeng et al (2016) and Liao et al. (2016)
Anura	Ranidae	Rana	japonica		Rana_japonica	1	m	Mass	9.3456	47.47	0.045092	21.87	adult		Zeng ZB et al. (2016) Ecol. Evol. 6:7070-7079	Used emprical data converting anuran brain volume to brain mass: mass (g) = 0.0016 * vol (mm3) + 0.0101, based on corresponding mass and volume data from Zeng et al (2016) and Liao et al. (2016)
Anura	Ranidae	Rana	japonica		Rana_japonica	1	m	Mass	12.51	53.38	0.048196	23.81	adult		Zeng ZB et al. (2016) Ecol. Evol. 6:7070-7079	Used emprical data converting anuran brain volume to brain mass: mass (g) = 0.0016 * vol (mm3) + 0.0101, based on corresponding mass and volume data from Zeng et al (2016) and Liao et al. (2016)
Anura	Ranidae	Rana	kukunoris		Rana_kukunoris	1	m	Mass	7.877	42.99	0.037012	16.82	adult		Zeng ZB et al. (2016) Ecol. Evol. 6:7070-7079	Used emprical data converting anuran brain volume to brain mass: mass (g) = 0.0016 * vol (mm3) + 0.0101, based on corresponding mass and volume data from Zeng et al (2016) and Liao et al. (2016)
Anura	Ranidae	Rana	kukunoris		Rana_kukunoris	1	m	Mass	5.333	40.64	0.038676	17.86	adult		Zeng ZB et al. (2016) Ecol. Evol. 6:7070-7079	Used emprical data converting anuran brain volume to brain mass: mass (g) = 0.0016 * vol (mm3) + 0.0101, based on corresponding mass and volume data from Zeng et al (2016) and Liao et al. (2016)
Anura	Ranidae	Rana	kukunoris		Rana_kukunoris	1	m	Mass	9.309	47.35	0.039188	18.18	adult		Zeng ZB et al. (2016) Ecol. Evol. 6:7070-7079	Used emprical data converting anuran brain volume to brain mass: mass (g) = 0.0016 * vol (mm3) + 0.0101, based on corresponding mass and volume data from Zeng et al (2016) and Liao et al. (2016)
Anura	Ranidae	Rana	kukunoris		Rana_kukunoris	1	m	Mass	8.893	46.02	0.045204	21.94	adult		Zeng ZB et al. (2016) Ecol. Evol. 6:7070-7079	Used emprical data converting anuran brain volume to brain mass: mass (g) = 0.0016 * vol (mm3) + 0.0101, based on corresponding mass and volume data from Zeng et al (2016) and Liao et al. (2016)
Anura	Ranidae	Rana	kukunoris		Rana_kukunoris	1	m	Mass	11.542	49.78	0.048948	24.28	adult		Zeng ZB et al. (2016) Ecol. Evol. 6:7070-7079	Used emprical data converting anuran brain volume to brain mass: mass (g) = 0.0016 * vol (mm3) + 0.0101, based on corresponding mass and volume data from Zeng et al (2016) and Liao et al. (2016)
Anura	Ranidae	Rana	kukunoris		Rana_kukunoris	1	m	Mass	12.297	52.78	0.05418	27.55	adult		Zeng ZB et al. (2016) Ecol. Evol. 6:7070-7079	Used emprical data converting anuran brain volume to brain mass: mass (g) = 0.0016 * vol (mm3) + 0.0101, based on corresponding mass and volume data from Zeng et al (2016) and Liao et al. (2016)
Anura	Ranidae	Rana	kukunoris		Rana_kukunoris	1	m	Mass	7.877	43.63	0.0362		adult		Liao WB et al. (2016) Am.Nat. 188:693-700
Anura	Ranidae	Rana	kukunoris		Rana_kukunoris	1	m	Mass	9.309	49.27	0.0378		adult		Liao WB et al. (2016) Am.Nat. 188:693-700
Anura	Ranidae	Rana	kukunoris		Rana_kukunoris	1	m	Mass	11.542	51.57	0.0499		adult		Liao WB et al. (2016) Am.Nat. 188:693-700
Anura	Ranidae	Rana	kukunoris		Rana_kukunoris	1	m	Mass	12.297	54.32	0.0492		adult		Liao WB et al. (2016) Am.Nat. 188:693-700
Anura	Ranidae	Rana	margaretae		Rana_margaretae	1	m	Mass	33.89	72.59	0.10738	60.8	adult	Odorrana_margaretae	Zeng ZB et al. (2016) Ecol. Evol. 6:7070-7079	Used emprical data converting anuran brain volume to brain mass: mass (g) = 0.0016 * vol (mm3) + 0.0101, based on corresponding mass and volume data from Zeng et al (2016) and Liao et al. (2016)
Anura	Ranidae	Rana	margaretae		Rana_margaretae	1	m	Mass	32.48	71.34	0.110628	62.83	adult	Odorrana_margaretae	Zeng ZB et al. (2016) Ecol. Evol. 6:7070-7079	Used emprical data converting anuran brain volume to brain mass: mass (g) = 0.0016 * vol (mm3) + 0.0101, based on corresponding mass and volume data from Zeng et al (2016) and Liao et al. (2016)
Anura	Ranidae	Rana	margaretae		Rana_margaretae	1	m	Mass	26.45	69.45	0.1144		adult	Odorrana_margaretae	Liao WB et al. (2016) Am.Nat. 188:693-700
Anura	Ranidae	Rana	margaretae		Rana_margaretae	1	m	Mass	32.0054	69.99	0.0573		adult	Odorrana_margaretae	Liao WB et al. (2016) Am.Nat. 188:693-700
Anura	Ranidae	Rana	margaretae		Rana_margaretae	1	m	Mass	30.31	71.33	0.0851		adult	Odorrana_margaretae	Liao WB et al. (2016) Am.Nat. 188:693-700
Anura	Ranidae	Rana	nigromaculata		Rana_nigromaculata	1	m	Mass	15.39	54.9	0.05058	25.3	adult	Pelophylax_nigromaculata	Zeng ZB et al. (2016) Ecol. Evol. 6:7070-7079	Used emprical data converting anuran brain volume to brain mass: mass (g) = 0.0016 * vol (mm3) + 0.0101, based on corresponding mass and volume data from Zeng et al (2016) and Liao et al. (2016)
Anura	Ranidae	Rana	nigromaculata		Rana_nigromaculata	1	m	Mass	18.16	58.32	0.053668	27.23	adult	Pelophylax_nigromaculata	Zeng ZB et al. (2016) Ecol. Evol. 6:7070-7079	Used emprical data converting anuran brain volume to brain mass: mass (g) = 0.0016 * vol (mm3) + 0.0101, based on corresponding mass and volume data from Zeng et al (2016) and Liao et al. (2016)
Anura	Ranidae	Rana	nigromaculata		Rana_nigromaculata	1	m	Mass	33.78	73.69	0.055828	28.58	adult	Pelophylax_nigromaculata	Zeng ZB et al. (2016) Ecol. Evol. 6:7070-7079	Used emprical data converting anuran brain volume to brain mass: mass (g) = 0.0016 * vol (mm3) + 0.0101, based on corresponding mass and volume data from Zeng et al (2016) and Liao et al. (2016)
Anura	Ranidae	Rana	nigromaculata		Rana_nigromaculata	1	m	Mass	25.86	65.82	0.06586	34.85	adult	Pelophylax_nigromaculata	Zeng ZB et al. (2016) Ecol. Evol. 6:7070-7079	Used emprical data converting anuran brain volume to brain mass: mass (g) = 0.0016 * vol (mm3) + 0.0101, based on corresponding mass and volume data from Zeng et al (2016) and Liao et al. (2016)
Anura	Ranidae	Rana	nigromaculata		Rana_nigromaculata	1	m	Mass	15.19	55.61	0.06666	35.35	adult	Pelophylax_nigromaculata	Zeng ZB et al. (2016) Ecol. Evol. 6:7070-7079	Used emprical data converting anuran brain volume to brain mass: mass (g) = 0.0016 * vol (mm3) + 0.0101, based on corresponding mass and volume data from Zeng et al (2016) and Liao et al. (2016)
Anura	Ranidae	Rana	nigromaculata		Rana_nigromaculata	1	m	Mass	41.41	80.55	0.077572	42.17	adult	Pelophylax_nigromaculata	Zeng ZB et al. (2016) Ecol. Evol. 6:7070-7079	Used emprical data converting anuran brain volume to brain mass: mass (g) = 0.0016 * vol (mm3) + 0.0101, based on corresponding mass and volume data from Zeng et al (2016) and Liao et al. (2016)
Anura	Ranidae	Rana	nigromaculata		Rana_nigromaculata	1	m	Mass	33.53	72.73	0.077716	42.26	adult	Pelophylax_nigromaculata	Zeng ZB et al. (2016) Ecol. Evol. 6:7070-7079	Used emprical data converting anuran brain volume to brain mass: mass (g) = 0.0016 * vol (mm3) + 0.0101, based on corresponding mass and volume data from Zeng et al (2016) and Liao et al. (2016)
Anura	Ranidae	Rana	nigromaculata		Rana_nigromaculata	1	m	Mass	23.69	60.14	0.079156	43.16	adult	Pelophylax_nigromaculata	Zeng ZB et al. (2016) Ecol. Evol. 6:7070-7079	Used emprical data converting anuran brain volume to brain mass: mass (g) = 0.0016 * vol (mm3) + 0.0101, based on corresponding mass and volume data from Zeng et al (2016) and Liao et al. (2016)
Anura	Ranidae	Rana	nigromaculata		Rana_nigromaculata	1	m	Mass	25.15	69.22	0.083316	45.76	adult	Pelophylax_nigromaculata	Zeng ZB et al. (2016) Ecol. Evol. 6:7070-7079	Used emprical data converting anuran brain volume to brain mass: mass (g) = 0.0016 * vol (mm3) + 0.0101, based on corresponding mass and volume data from Zeng et al (2016) and Liao et al. (2016)
Anura	Ranidae	Rana	nigromaculata		Rana_nigromaculata	1	m	Mass	38.6	78.72	0.084676	46.61	adult	Pelophylax_nigromaculata	Zeng ZB et al. (2016) Ecol. Evol. 6:7070-7079	Used emprical data converting anuran brain volume to brain mass: mass (g) = 0.0016 * vol (mm3) + 0.0101, based on corresponding mass and volume data from Zeng et al (2016) and Liao et al. (2016)
Anura	Ranidae	Rana	nigromaculata		Rana_nigromaculata	1	m	Mass	30.85	69.74	0.090388	50.18	adult	Pelophylax_nigromaculata	Zeng ZB et al. (2016) Ecol. Evol. 6:7070-7079	Used emprical data converting anuran brain volume to brain mass: mass (g) = 0.0016 * vol (mm3) + 0.0101, based on corresponding mass and volume data from Zeng et al (2016) and Liao et al. (2016)
Anura	Ranidae	Rana	nigromaculata		Rana_nigromaculata	1	m	Mass	40.51	78.23	0.091172	50.67	adult	Pelophylax_nigromaculata	Zeng ZB et al. (2016) Ecol. Evol. 6:7070-7079	Used emprical data converting anuran brain volume to brain mass: mass (g) = 0.0016 * vol (mm3) + 0.0101, based on corresponding mass and volume data from Zeng et al (2016) and Liao et al. (2016)
Anura	Ranidae	Rana	nigromaculata		Rana_nigromaculata	1	m	Mass	32.45	70.85	0.096756	54.16	adult	Pelophylax_nigromaculata	Zeng ZB et al. (2016) Ecol. Evol. 6:7070-7079	Used emprical data converting anuran brain volume to brain mass: mass (g) = 0.0016 * vol (mm3) + 0.0101, based on corresponding mass and volume data from Zeng et al (2016) and Liao et al. (2016)
Anura	Ranidae	Rana	nigromaculata		Rana_nigromaculata	1	m	Mass	18.61	58.23	0.0618	24.81	adult	Pelophylax_nigromaculata	Liao WB et al. (2016) Am.Nat. 188:693-700
Anura	Ranidae	Rana	nigromaculata		Rana_nigromaculata	1	m	Mass	29.49	70.28	0.0799		adult	Pelophylax_nigromaculata	Liao WB et al. (2016) Am.Nat. 188:693-700
Anura	Ranidae	Rana	nigromaculata		Rana_nigromaculata	1	m	Mass	31.32	71.84	0.0823	44.33	adult	Pelophylax_nigromaculata	Liao WB et al. (2016) Am.Nat. 188:693-700
Anura	Ranidae	Rana	nigromaculata		Rana_nigromaculata	1	m	Mass	31.59	72.56	0.0833		adult	Pelophylax_nigromaculata	Liao WB et al. (2016) Am.Nat. 188:693-700
Anura	Ranidae	Rana	omeimontis		Rana_omeimontis	1	m	Mass	8.2437	45.65	0.049396	24.56	adult		Zeng ZB et al. (2016) Ecol. Evol. 6:7070-7079	Used emprical data converting anuran brain volume to brain mass: mass (g) = 0.0016 * vol (mm3) + 0.0101, based on corresponding mass and volume data from Zeng et al (2016) and Liao et al. (2016)
Anura	Ranidae	Rana	omeimontis		Rana_omeimontis	1	m	Mass	13.8412	50.44	0.062852	32.97	adult		Zeng ZB et al. (2016) Ecol. Evol. 6:7070-7079	Used emprical data converting anuran brain volume to brain mass: mass (g) = 0.0016 * vol (mm3) + 0.0101, based on corresponding mass and volume data from Zeng et al (2016) and Liao et al. (2016)
Anura	Ranidae	Rana	omeimontis		Rana_omeimontis	1	m	Mass	19.0785	51.88	0.067812	36.07	adult		Zeng ZB et al. (2016) Ecol. Evol. 6:7070-7079	Used emprical data converting anuran brain volume to brain mass: mass (g) = 0.0016 * vol (mm3) + 0.0101, based on corresponding mass and volume data from Zeng et al (2016) and Liao et al. (2016)
Anura	Ranidae	Rana	omeimontis		Rana_omeimontis	1	m	Mass	10.7743	51.47	0.072548	39.03	adult		Zeng ZB et al. (2016) Ecol. Evol. 6:7070-7079	Used emprical data converting anuran brain volume to brain mass: mass (g) = 0.0016 * vol (mm3) + 0.0101, based on corresponding mass and volume data from Zeng et al (2016) and Liao et al. (2016)
Anura	Ranidae	Rana	omeimontis		Rana_omeimontis	1	m	Mass	6.9926	41.29	0.07522	40.7	adult		Zeng ZB et al. (2016) Ecol. Evol. 6:7070-7079	Used emprical data converting anuran brain volume to brain mass: mass (g) = 0.0016 * vol (mm3) + 0.0101, based on corresponding mass and volume data from Zeng et al (2016) and Liao et al. (2016)
Anura	Ranidae	Rana	omeimontis		Rana_omeimontis	1	m	Mass	6.1387	39.61	0.076372	41.42	adult		Zeng ZB et al. (2016) Ecol. Evol. 6:7070-7079	Used emprical data converting anuran brain volume to brain mass: mass (g) = 0.0016 * vol (mm3) + 0.0101, based on corresponding mass and volume data from Zeng et al (2016) and Liao et al. (2016)
Anura	Ranidae	Rana	omeimontis		Rana_omeimontis	1	m	Mass	12.415	49.5	0.077012	41.82	adult		Zeng ZB et al. (2016) Ecol. Evol. 6:7070-7079	Used emprical data converting anuran brain volume to brain mass: mass (g) = 0.0016 * vol (mm3) + 0.0101, based on corresponding mass and volume data from Zeng et al (2016) and Liao et al. (2016)
Anura	Ranidae	Rana	omeimontis		Rana_omeimontis	1	m	Mass	12.114	50.44	0.07946	43.35	adult		Zeng ZB et al. (2016) Ecol. Evol. 6:7070-7079	Used emprical data converting anuran brain volume to brain mass: mass (g) = 0.0016 * vol (mm3) + 0.0101, based on corresponding mass and volume data from Zeng et al (2016) and Liao et al. (2016)
Anura	Ranidae	Rana	omeimontis		Rana_omeimontis	1	m	Mass	15.2955	51.71	0.097972	54.92	adult		Zeng ZB et al. (2016) Ecol. Evol. 6:7070-7079	Used emprical data converting anuran brain volume to brain mass: mass (g) = 0.0016 * vol (mm3) + 0.0101, based on corresponding mass and volume data from Zeng et al (2016) and Liao et al. (2016)
Anura	Ranidae	Rana	omeimontis		Rana_omeimontis	1	m	Mass	6.31	46.72	0.0578		adult		Liao WB et al. (2016) Am.Nat. 188:693-700
Anura	Ranidae	Rana	omeimontis		Rana_omeimontis	1	m	Mass	6.5047	48.29	0.0438		adult		Liao WB et al. (2016) Am.Nat. 188:693-700
Anura	Ranidae	Rana	omeimontis		Rana_omeimontis	1	m	Mass	7.3409	48.78	0.0582		adult		Liao WB et al. (2016) Am.Nat. 188:693-700
Anura	Ranidae	Rana	omeimontis		Rana_omeimontis	1	m	Mass	5.8286	49.08	0.0483		adult		Liao WB et al. (2016) Am.Nat. 188:693-700
Anura	Ranidae	Rana	omeimontis		Rana_omeimontis	1	m	Mass	8.1268	50.12	0.0745		adult		Liao WB et al. (2016) Am.Nat. 188:693-700
Anura	Ranidae	Rana	omeimontis		Rana_omeimontis	1	m	Mass	6.9364	50.46	0.0586		adult		Liao WB et al. (2016) Am.Nat. 188:693-700
Anura	Ranidae	Rana	omeimontis		Rana_omeimontis	1	m	Mass	7.0156	51.18	0.0626		adult		Liao WB et al. (2016) Am.Nat. 188:693-700
Anura	Ranidae	Rana	omeimontis		Rana_omeimontis	1	m	Mass	12.6735	57.34	0.0542		adult		Liao WB et al. (2016) Am.Nat. 188:693-700
Anura	Ranidae	Rana	plancyi		Rana_plancyi	1	m	Mass	24.0832	56.89	0.052708	26.63	adult	Pelophylax_plancyi	Zeng ZB et al. (2016) Ecol. Evol. 6:7070-7079	Used emprical data converting anuran brain volume to brain mass: mass (g) = 0.0016 * vol (mm3) + 0.0101, based on corresponding mass and volume data from Zeng et al (2016) and Liao et al. (2016)
Anura	Ranidae	Rana	plancyi		Rana_plancyi	1	m	Mass	21.1713	53.79	0.055188	28.18	adult	Pelophylax_plancyi	Zeng ZB et al. (2016) Ecol. Evol. 6:7070-7079	Used emprical data converting anuran brain volume to brain mass: mass (g) = 0.0016 * vol (mm3) + 0.0101, based on corresponding mass and volume data from Zeng et al (2016) and Liao et al. (2016)
Anura	Ranidae	Rana	pleuraden		Rana_pleuraden	1	m	Mass	7.9394	43.12	0.028468	11.48	adult	Pelophylax_pleuraden	Zeng ZB et al. (2016) Ecol. Evol. 6:7070-7079	Used emprical data converting anuran brain volume to brain mass: mass (g) = 0.0016 * vol (mm3) + 0.0101, based on corresponding mass and volume data from Zeng et al (2016) and Liao et al. (2016)
Anura	Ranidae	Rana	pleuraden		Rana_pleuraden	1	m	Mass	4.71	39.79	0.042116	20.01	adult	Pelophylax_pleuraden	Zeng ZB et al. (2016) Ecol. Evol. 6:7070-7079	Used emprical data converting anuran brain volume to brain mass: mass (g) = 0.0016 * vol (mm3) + 0.0101, based on corresponding mass and volume data from Zeng et al (2016) and Liao et al. (2016)
Anura	Ranidae	Rana	pleuraden		Rana_pleuraden	1	m	Mass	8.1855	44.4	0.044164	21.29	adult	Pelophylax_pleuraden	Zeng ZB et al. (2016) Ecol. Evol. 6:7070-7079	Used emprical data converting anuran brain volume to brain mass: mass (g) = 0.0016 * vol (mm3) + 0.0101, based on corresponding mass and volume data from Zeng et al (2016) and Liao et al. (2016)
Anura	Ranidae	Rana	pleuraden		Rana_pleuraden	1	m	Mass	7.5	47.07	0.046628	22.83	adult	Pelophylax_pleuraden	Zeng ZB et al. (2016) Ecol. Evol. 6:7070-7079	Used emprical data converting anuran brain volume to brain mass: mass (g) = 0.0016 * vol (mm3) + 0.0101, based on corresponding mass and volume data from Zeng et al (2016) and Liao et al. (2016)
Anura	Ranidae	Rana	pleuraden		Rana_pleuraden	1	m	Mass	9.8408	48.96	0.049684	24.74	adult	Pelophylax_pleuraden	Zeng ZB et al. (2016) Ecol. Evol. 6:7070-7079	Used emprical data converting anuran brain volume to brain mass: mass (g) = 0.0016 * vol (mm3) + 0.0101, based on corresponding mass and volume data from Zeng et al (2016) and Liao et al. (2016)
Anura	Ranidae	Rana	pleuraden		Rana_pleuraden	1	m	Mass	11.3967	48.05	0.0521	26.25	adult	Pelophylax_pleuraden	Zeng ZB et al. (2016) Ecol. Evol. 6:7070-7079	Used emprical data converting anuran brain volume to brain mass: mass (g) = 0.0016 * vol (mm3) + 0.0101, based on corresponding mass and volume data from Zeng et al (2016) and Liao et al. (2016)
Anura	Ranidae	Rana	pleuraden		Rana_pleuraden	1	m	Mass	9.8656	45.92	0.052196	26.31	adult	Pelophylax_pleuraden	Zeng ZB et al. (2016) Ecol. Evol. 6:7070-7079	Used emprical data converting anuran brain volume to brain mass: mass (g) = 0.0016 * vol (mm3) + 0.0101, based on corresponding mass and volume data from Zeng et al (2016) and Liao et al. (2016)
Anura	Ranidae	Rana	pleuraden		Rana_pleuraden	1	m	Mass	7.4245	45.91	0.058372	30.17	adult	Pelophylax_pleuraden	Zeng ZB et al. (2016) Ecol. Evol. 6:7070-7079	Used emprical data converting anuran brain volume to brain mass: mass (g) = 0.0016 * vol (mm3) + 0.0101, based on corresponding mass and volume data from Zeng et al (2016) and Liao et al. (2016)
Anura	Ranidae	Rana	pleuraden		Rana_pleuraden	1	m	Mass	8.669	44.42	0.068212	36.32	adult	Pelophylax_pleuraden	Zeng ZB et al. (2016) Ecol. Evol. 6:7070-7079	Used emprical data converting anuran brain volume to brain mass: mass (g) = 0.0016 * vol (mm3) + 0.0101, based on corresponding mass and volume data from Zeng et al (2016) and Liao et al. (2016)
Anura	Ranidae	Rana	pleuraden		Rana_pleuraden	1	m	Mass	8.34	46.01	0.0881	48.75	adult	Pelophylax_pleuraden	Zeng ZB et al. (2016) Ecol. Evol. 6:7070-7079	Used emprical data converting anuran brain volume to brain mass: mass (g) = 0.0016 * vol (mm3) + 0.0101, based on corresponding mass and volume data from Zeng et al (2016) and Liao et al. (2016)
Anura	Ranidae	Rana	pleuraden		Rana_pleuraden	1	m	Mass	3.3617	35.4	0.0276		adult	Pelophylax_pleuraden	Liao WB et al. (2016) Am.Nat. 188:693-700
Anura	Ranidae	Rana	pleuraden		Rana_pleuraden	1	m	Mass	4.2842	38.15	0.029		adult	Pelophylax_pleuraden	Liao WB et al. (2016) Am.Nat. 188:693-700
Anura	Ranidae	Rana	pleuraden		Rana_pleuraden	1	m	Mass	8.13	46.07	0.0544		adult	Pelophylax_pleuraden	Liao WB et al. (2016) Am.Nat. 188:693-700
Anura	Ranidae	Rana	pleuraden		Rana_pleuraden	1	m	Mass	9.9	47.25	0.0438		adult	Pelophylax_pleuraden	Liao WB et al. (2016) Am.Nat. 188:693-700
Anura	Ranidae	Rana	pleuraden		Rana_pleuraden	1	m	Mass	9.3406	47.31	0.0542		adult	Pelophylax_pleuraden	Liao WB et al. (2016) Am.Nat. 188:693-700
Anura	Ranidae	Rana	pleuraden		Rana_pleuraden	1	m	Mass	9.2	48.94	0.0524		adult	Pelophylax_pleuraden	Liao WB et al. (2016) Am.Nat. 188:693-700
Anura	Ranidae	Rana	pleuraden		Rana_pleuraden	1	m	Mass	10.65	48.97	0.0383		adult	Pelophylax_pleuraden	Liao WB et al. (2016) Am.Nat. 188:693-700
Anura	Ranidae	Rana	pleuraden		Rana_pleuraden	1	m	Mass	10.58	49.44	0.0655		adult	Pelophylax_pleuraden	Liao WB et al. (2016) Am.Nat. 188:693-700
Anura	Ranidae	Rana	pleuraden		Rana_pleuraden	1	m	Mass	10.72	49.47	0.0467		adult	Pelophylax_pleuraden	Liao WB et al. (2016) Am.Nat. 188:693-700
Anura	Ranidae	Rana	pleuraden		Rana_pleuraden	1	m	Mass	11.78	49.54	0.0724		adult	Pelophylax_pleuraden	Liao WB et al. (2016) Am.Nat. 188:693-700
Anura	Ranidae	Rana	pleuraden		Rana_pleuraden	1	m	Mass	13.63	51.73	0.0632		adult	Pelophylax_pleuraden	Liao WB et al. (2016) Am.Nat. 188:693-700
Anura	Ranidae	Rana	pleuraden		Rana_pleuraden	1	m	Mass	17.37	55.49	0.0605		adult	Pelophylax_pleuraden	Liao WB et al. (2016) Am.Nat. 188:693-700
Anura	Rhacophoridae	Polypedates	megacephalus		Polypedates_megacephalus	1	m	Mass	3.8038	38.05	0.0416		adult		Liao WB et al. (2016) Am.Nat. 188:693-700
Anura	Rhacophoridae	Polypedates	megacephalus		Polypedates_megacephalus	1	m	Mass	3.911	38.07	0.0412		adult		Liao WB et al. (2016) Am.Nat. 188:693-700
Anura	Rhacophoridae	Polypedates	megacephalus		Polypedates_megacephalus	1	m	Mass	4.0672	39.75	0.0438	33.58	adult		Liao WB et al. (2016) Am.Nat. 188:693-700
Anura	Rhacophoridae	Polypedates	megacephalus		Polypedates_megacephalus	1	m	Mass	5.1001	40.85	0.0557		adult		Liao WB et al. (2016) Am.Nat. 188:693-700
Anura	Rhacophoridae	Polypedates	megacephalus		Polypedates_megacephalus	1	m	Mass	5.0349	41.77	0.0474	32.16	adult		Liao WB et al. (2016) Am.Nat. 188:693-700
Anura	Rhacophoridae	Polypedates	megacephalus		Polypedates_megacephalus	1	m	Mass	5.6243	41.97	0.041		adult		Liao WB et al. (2016) Am.Nat. 188:693-700
Anura	Rhacophoridae	Polypedates	megacephalus		Polypedates_megacephalus	1	m	Mass	5.1626	42	0.0516		adult		Liao WB et al. (2016) Am.Nat. 188:693-700
Anura	Rhacophoridae	Polypedates	megacephalus		Polypedates_megacephalus	1	m	Mass	4.6524	42.48	0.039	25.94	adult		Liao WB et al. (2016) Am.Nat. 188:693-700
Anura	Rhacophoridae	Polypedates	megacephalus		Polypedates_megacephalus	1	m	Mass	4.7821	42.91	0.0266		adult		Liao WB et al. (2016) Am.Nat. 188:693-700
Anura	Rhacophoridae	Polypedates	megacephalus		Polypedates_megacephalus	1	m	Mass	5.2907	43.57	0.0292		adult		Liao WB et al. (2016) Am.Nat. 188:693-700
Anura	Rhacophoridae	Polypedates	megacephalus		Polypedates_megacephalus	1	m	Mass	4.7953	44.14	0.0248		adult		Liao WB et al. (2016) Am.Nat. 188:693-700
Anura	Rhacophoridae	Polypedates	megacephalus		Polypedates_megacephalus	1	m	Mass	6.0064	44.59	0.0512	32.63	adult		Liao WB et al. (2016) Am.Nat. 188:693-700
Anura	Rhacophoridae	Polypedates	megacephalus		Polypedates_megacephalus	1	m	Mass	6.3723	44.65	0.056		adult		Liao WB et al. (2016) Am.Nat. 188:693-700
Anura	Rhacophoridae	Polypedates	megacephalus		Polypedates_megacephalus	1	m	Mass	5.8603	45.23	0.0602	36.86	adult		Liao WB et al. (2016) Am.Nat. 188:693-700
Anura	Rhacophoridae	Polypedates	megacephalus		Polypedates_megacephalus	1	m	Mass	5.9069	46	0.0392		adult		Liao WB et al. (2016) Am.Nat. 188:693-700
Anura	Rhacophoridae	Polypedates	megacephalus		Polypedates_megacephalus	1	m	Mass	6.5172	47.88	0.0496	24.77	adult		Liao WB et al. (2016) Am.Nat. 188:693-700
Anura	Rhacophoridae	Rhacophorus	chenfui		Rhacophorus_chenfui	1	m	Mass	5.0926	37.87	0.0257	14.81	adult		Liao WB et al. (2016) Am.Nat. 188:693-700
Anura	Rhacophoridae	Rhacophorus	chenfui		Rhacophorus_chenfui	1	m	Mass	5.7547	38.58	0.0335		adult		Liao WB et al. (2016) Am.Nat. 188:693-700
Anura	Rhacophoridae	Rhacophorus	chenfui		Rhacophorus_chenfui	1	m	Mass	6.4169	39.29	0.0413	20.72	adult		Liao WB et al. (2016) Am.Nat. 188:693-700
Anura	Rhacophoridae	Rhacophorus	dugritei		Rhacophorus_dugritei	1	m	Mass	4.8743	38.3	0.036		adult		Liao WB et al. (2016) Am.Nat. 188:693-700
Anura	Rhacophoridae	Rhacophorus	dugritei		Rhacophorus_dugritei	1	m	Mass	4.7488	39.05	0.0464		adult		Liao WB et al. (2016) Am.Nat. 188:693-700
Anura	Rhacophoridae	Rhacophorus	dugritei		Rhacophorus_dugritei	1	m	Mass	4.631	40.15	0.0429	22.68	adult		Liao WB et al. (2016) Am.Nat. 188:693-700
Anura	Rhacophoridae	Rhacophorus	dugritei		Rhacophorus_dugritei	1	m	Mass	5.218	41.36	0.0497	25.34	adult		Liao WB et al. (2016) Am.Nat. 188:693-700
Anura	Rhacophoridae	Rhacophorus	dugritei		Rhacophorus_dugritei	1	m	Mass	4.8912	41.59	0.041	22.5	adult		Liao WB et al. (2016) Am.Nat. 188:693-700
Anura	Rhacophoridae	Rhacophorus	dugritei		Rhacophorus_dugritei	1	m	Mass	5.3929	42.03	0.0398	20.93	adult		Liao WB et al. (2016) Am.Nat. 188:693-700
Anura	Rhacophoridae	Rhacophorus	dugritei		Rhacophorus_dugritei	1	m	Mass	6.0692	42.1	0.0398		adult		Liao WB et al. (2016) Am.Nat. 188:693-700
Anura	Rhacophoridae	Rhacophorus	dugritei		Rhacophorus_dugritei	1	m	Mass	7.2152	42.32	0.0407		adult		Liao WB et al. (2016) Am.Nat. 188:693-700
Anura	Rhacophoridae	Rhacophorus	dugritei		Rhacophorus_dugritei	1	m	Mass	5.8253	42.86	0.0369		adult		Liao WB et al. (2016) Am.Nat. 188:693-700
Anura	Rhacophoridae	Rhacophorus	dugritei		Rhacophorus_dugritei	1	m	Mass	6.0421	43.04	0.0418		adult		Liao WB et al. (2016) Am.Nat. 188:693-700
Anura	Rhacophoridae	Rhacophorus	dugritei		Rhacophorus_dugritei	1	m	Mass	6.0135	43.11	0.0451	21.64	adult		Liao WB et al. (2016) Am.Nat. 188:693-700
Anura	Rhacophoridae	Rhacophorus	dugritei		Rhacophorus_dugritei	1	m	Mass	5.9508	44.68	0.0441	25.99	adult		Liao WB et al. (2016) Am.Nat. 188:693-700
Anura	Rhacophoridae	Rhacophorus	omeimontis		Rhacophorus_omeimontis	1	m	Mass	8.96	54.45	0.0603	52.49	adult		Liao WB et al. (2016) Am.Nat. 188:693-700
Anura	Rhacophoridae	Rhacophorus	omeimontis		Rhacophorus_omeimontis	1	m	Mass	8.87	55.04	0.0428		adult		Liao WB et al. (2016) Am.Nat. 188:693-700
Anura	Rhacophoridae	Rhacophorus	omeimontis		Rhacophorus_omeimontis	1	m	Mass	10.57	55.92	0.0573		adult		Liao WB et al. (2016) Am.Nat. 188:693-700
Anura	Rhacophoridae	Rhacophorus	omeimontis		Rhacophorus_omeimontis	1	m	Mass	10.76	56.38	0.0747	49.16	adult		Liao WB et al. (2016) Am.Nat. 188:693-700
Anura	Rhacophoridae	Rhacophorus	omeimontis		Rhacophorus_omeimontis	1	m	Mass	11.04	57.56	0.0642		adult		Liao WB et al. (2016) Am.Nat. 188:693-700
Anura	Rhacophoridae	Rhacophorus	omeimontis		Rhacophorus_omeimontis	1	m	Mass	11.01	57.58	0.0698	44.37	adult		Liao WB et al. (2016) Am.Nat. 188:693-700
Anura	Rhacophoridae	Rhacophorus	omeimontis		Rhacophorus_omeimontis	1	m	Mass	9.71	57.98	0.0572	31	adult		Liao WB et al. (2016) Am.Nat. 188:693-700
Anura	Rhacophoridae	Rhacophorus	omeimontis		Rhacophorus_omeimontis	1	m	Mass	12.33	60.21	0.0674	52.3	adult		Liao WB et al. (2016) Am.Nat. 188:693-700
Anura	Rhacophoridae	Rhacophorus	omeimontis		Rhacophorus_omeimontis	1	m	Mass	14.11	64.24	0.0652		adult		Liao WB et al. (2016) Am.Nat. 188:693-700
Anura	Rhacophoridae	Rhacophorus	omeimontis		Rhacophorus_omeimontis	1	m	Mass	14.6	65.79	0.0877	43.15	adult		Liao WB et al. (2016) Am.Nat. 188:693-700
Anura	Rhacophoridae	Rhacophorus	omeimontis		Rhacophorus_omeimontis	1	m	Mass	13.93	66.32	0.0874	40.35	adult		Liao WB et al. (2016) Am.Nat. 188:693-700
Anura	UNKNOWN	Brachytarsophrys	chuannanensis		Brachytarsophrys_chuannanensis	1	m	Mass	113.75	109.47	0.078404	42.69	adult		Zeng ZB et al. (2016) Ecol. Evol. 6:7070-7079	Used emprical data converting anuran brain volume to brain mass: mass (g) = 0.0016 * vol (mm3) + 0.0101, based on corresponding mass and volume data from Zeng et al (2016) and Liao et al. (2016)
Anura	UNKNOWN	Brachytarsophrys	chuannanensis		Brachytarsophrys_chuannanensis	1	m	Mass	87.88	94.25	0.080132	43.77	adult		Zeng ZB et al. (2016) Ecol. Evol. 6:7070-7079	Used emprical data converting anuran brain volume to brain mass: mass (g) = 0.0016 * vol (mm3) + 0.0101, based on corresponding mass and volume data from Zeng et al (2016) and Liao et al. (2016)
Anura	UNKNOWN	Brachytarsophrys	feae		Brachytarsophrys_feae	1	m	Mass	93.5049	95.61	0.047076	23.11	adult		Zeng ZB et al. (2016) Ecol. Evol. 6:7070-7079	Used emprical data converting anuran brain volume to brain mass: mass (g) = 0.0016 * vol (mm3) + 0.0101, based on corresponding mass and volume data from Zeng et al (2016) and Liao et al. (2016)
Urodela	Ambystomatidae	Ambystoma	maculatum		Ambystoma_maculatum	3	unknown	Mass	14.45		0.0372		unknown		Thireau M (1975) Bull. Mus. Natn. Hist. Nat. Paris. Zool. 207:483-501
Urodela	Ambystomatidae	Ambystoma	mexicanum		Ambystoma_mexicanum	1	unknown	Mass	52.6		0.072		unknown	Ambystoma sp.	Thireau M (1975) Bull. Mus. Natn. Hist. Nat. Paris. Zool. 207:483-501	Identity guessed from its large body mass
Urodela	Ambystomatidae	Ambystoma	texanum		Ambystoma_texanum	4	unknown	Mass	4.09		0.0152		unknown		Thireau M (1975) Bull. Mus. Natn. Hist. Nat. Paris. Zool. 207:483-501
Urodela	Ambystomatidae	Dicamptodon	ensatus		Dicamptodon_ensatus	1	unknown	Mass	81.82		0.1169		unknown		Thireau M (1975) Bull. Mus. Natn. Hist. Nat. Paris. Zool. 207:483-501
Urodela	Ambystomatidae	Rhyacotriton	olympicus		Rhyacotriton_olympicus	2	unknown	Mass	1.14		0.012		unknown		Thireau M (1975) Bull. Mus. Natn. Hist. Nat. Paris. Zool. 207:483-501
Urodela	Hynobiidae	Hynobius	naevius		Hynobius_naevius	1	unknown	Mass	4.55		0.0192		unknown		Thireau M (1975) Bull. Mus. Natn. Hist. Nat. Paris. Zool. 207:483-501
Urodela	Hynobiidae	Hynobius	nebulosus		Hynobius_nebulosus	1	unknown	Mass	2		0.009		unknown		Thireau M (1975) Bull. Mus. Natn. Hist. Nat. Paris. Zool. 207:483-501
Urodela	Hynobiidae	Onychodactylus	japonicus		Onychodactylus_japonicus	1	f	Mass	5.74		0.0214		unknown		Thireau M (1975) Bull. Mus. Natn. Hist. Nat. Paris. Zool. 207:467-482
Urodela	Hynobiidae	Onychodactylus	japonicus		Onychodactylus_japonicus	1	f	Mass	4.65		0.0194		unknown		Thireau M (1975) Bull. Mus. Natn. Hist. Nat. Paris. Zool. 207:467-482
Urodela	Hynobiidae	Onychodactylus	japonicus		Onychodactylus_japonicus	1	f	Mass	4.07		0.0208		unknown		Thireau M (1975) Bull. Mus. Natn. Hist. Nat. Paris. Zool. 207:467-482
Urodela	Hynobiidae	Onychodactylus	japonicus		Onychodactylus_japonicus	1	f	Mass	4.99		0.0222		unknown		Thireau M (1975) Bull. Mus. Natn. Hist. Nat. Paris. Zool. 207:467-482
Urodela	Hynobiidae	Onychodactylus	japonicus		Onychodactylus_japonicus	1	f	Mass	5.52		0.026		unknown		Thireau M (1975) Bull. Mus. Natn. Hist. Nat. Paris. Zool. 207:467-482
Urodela	Hynobiidae	Onychodactylus	japonicus		Onychodactylus_japonicus	1	f	Mass	4.32		0.0191		unknown		Thireau M (1975) Bull. Mus. Natn. Hist. Nat. Paris. Zool. 207:467-482
Urodela	Hynobiidae	Onychodactylus	japonicus		Onychodactylus_japonicus	1	f	Mass	4.41		0.0198		unknown		Thireau M (1975) Bull. Mus. Natn. Hist. Nat. Paris. Zool. 207:467-482
Urodela	Hynobiidae	Onychodactylus	japonicus		Onychodactylus_japonicus	1	f	Mass	5.57		0.022		unknown		Thireau M (1975) Bull. Mus. Natn. Hist. Nat. Paris. Zool. 207:467-482
Urodela	Hynobiidae	Onychodactylus	japonicus		Onychodactylus_japonicus	1	f	Mass	4.6		0.0203		unknown		Thireau M (1975) Bull. Mus. Natn. Hist. Nat. Paris. Zool. 207:467-482
Urodela	Hynobiidae	Onychodactylus	japonicus		Onychodactylus_japonicus	1	m	Mass	4.5		0.0202		unknown		Thireau M (1975) Bull. Mus. Natn. Hist. Nat. Paris. Zool. 207:467-482
Urodela	Hynobiidae	Onychodactylus	japonicus		Onychodactylus_japonicus	1	m	Mass	5.02		0.0213		unknown		Thireau M (1975) Bull. Mus. Natn. Hist. Nat. Paris. Zool. 207:467-482
Urodela	Hynobiidae	Onychodactylus	japonicus		Onychodactylus_japonicus	1	m	Mass	6.31		0.0234		unknown		Thireau M (1975) Bull. Mus. Natn. Hist. Nat. Paris. Zool. 207:467-482
Urodela	Hynobiidae	Onychodactylus	japonicus		Onychodactylus_japonicus	1	m	Mass	4.79		0.0212		unknown		Thireau M (1975) Bull. Mus. Natn. Hist. Nat. Paris. Zool. 207:467-482
Urodela	Hynobiidae	Onychodactylus	japonicus		Onychodactylus_japonicus	1	m	Mass	5.61		0.0226		unknown		Thireau M (1975) Bull. Mus. Natn. Hist. Nat. Paris. Zool. 207:467-482
Urodela	Hynobiidae	Onychodactylus	japonicus		Onychodactylus_japonicus	1	m	Mass	5.59		0.0231		unknown		Thireau M (1975) Bull. Mus. Natn. Hist. Nat. Paris. Zool. 207:467-482
Urodela	Hynobiidae	Onychodactylus	japonicus		Onychodactylus_japonicus	1	m	Mass	4.45		0.0206		unknown		Thireau M (1975) Bull. Mus. Natn. Hist. Nat. Paris. Zool. 207:467-482
Urodela	Hynobiidae	Onychodactylus	japonicus		Onychodactylus_japonicus	1	m	Mass	5.91		0.022		unknown		Thireau M (1975) Bull. Mus. Natn. Hist. Nat. Paris. Zool. 207:467-482
Urodela	Hynobiidae	Onychodactylus	japonicus		Onychodactylus_japonicus	1	m	Mass	5.81		0.0226		unknown		Thireau M (1975) Bull. Mus. Natn. Hist. Nat. Paris. Zool. 207:467-482
Urodela	Plethodontidae	Aneides	lugubris		Aneides_lugubris	2	m	Mass	4.59		0.0235		unknown		Thireau M (1975) Bull. Mus. Natn. Hist. Nat. Paris. Zool. 207:483-501
Urodela	Plethodontidae	Batrachoseps	attenuatus		Batrachoseps_attenuatus	1	f	Mass	0.87		0.0039		unknown		Thireau M (1975) Bull. Mus. Natn. Hist. Nat. Paris. Zool. 207:467-482
Urodela	Plethodontidae	Batrachoseps	attenuatus		Batrachoseps_attenuatus	1	f	Mass	0.81		0.0035		unknown		Thireau M (1975) Bull. Mus. Natn. Hist. Nat. Paris. Zool. 207:467-482
Urodela	Plethodontidae	Batrachoseps	attenuatus		Batrachoseps_attenuatus	1	f	Mass	0.67		0.0032		unknown		Thireau M (1975) Bull. Mus. Natn. Hist. Nat. Paris. Zool. 207:467-482
Urodela	Plethodontidae	Batrachoseps	attenuatus		Batrachoseps_attenuatus	1	f	Mass	0.57		0.0031		unknown		Thireau M (1975) Bull. Mus. Natn. Hist. Nat. Paris. Zool. 207:467-482
Urodela	Plethodontidae	Batrachoseps	attenuatus		Batrachoseps_attenuatus	1	f	Mass	0.98		0.0034		unknown		Thireau M (1975) Bull. Mus. Natn. Hist. Nat. Paris. Zool. 207:467-482
Urodela	Plethodontidae	Batrachoseps	attenuatus		Batrachoseps_attenuatus	1	f	Mass	0.44		0.0027		unknown		Thireau M (1975) Bull. Mus. Natn. Hist. Nat. Paris. Zool. 207:467-482
Urodela	Plethodontidae	Batrachoseps	attenuatus		Batrachoseps_attenuatus	1	f	Mass	1.04		0.0041		unknown		Thireau M (1975) Bull. Mus. Natn. Hist. Nat. Paris. Zool. 207:467-482
Urodela	Plethodontidae	Batrachoseps	attenuatus		Batrachoseps_attenuatus	1	f	Mass	1.02		0.0037		unknown		Thireau M (1975) Bull. Mus. Natn. Hist. Nat. Paris. Zool. 207:467-482
Urodela	Plethodontidae	Batrachoseps	attenuatus		Batrachoseps_attenuatus	1	f	Mass	0.66		0.003		unknown		Thireau M (1975) Bull. Mus. Natn. Hist. Nat. Paris. Zool. 207:467-482
Urodela	Plethodontidae	Batrachoseps	attenuatus		Batrachoseps_attenuatus	1	f	Mass	0.6		0.0037		unknown		Thireau M (1975) Bull. Mus. Natn. Hist. Nat. Paris. Zool. 207:467-482
Urodela	Plethodontidae	Batrachoseps	attenuatus		Batrachoseps_attenuatus	1	f	Mass	1		0.0032		unknown		Thireau M (1975) Bull. Mus. Natn. Hist. Nat. Paris. Zool. 207:467-482
Urodela	Plethodontidae	Batrachoseps	attenuatus		Batrachoseps_attenuatus	1	f	Mass	0.93		0.0036		unknown		Thireau M (1975) Bull. Mus. Natn. Hist. Nat. Paris. Zool. 207:467-482
Urodela	Plethodontidae	Batrachoseps	attenuatus		Batrachoseps_attenuatus	1	m	Mass	0.83		0.0037		unknown		Thireau M (1975) Bull. Mus. Natn. Hist. Nat. Paris. Zool. 207:467-482
Urodela	Plethodontidae	Batrachoseps	attenuatus		Batrachoseps_attenuatus	1	m	Mass	0.71		0.0035		unknown		Thireau M (1975) Bull. Mus. Natn. Hist. Nat. Paris. Zool. 207:467-482
Urodela	Plethodontidae	Batrachoseps	attenuatus		Batrachoseps_attenuatus	1	m	Mass	0.86		0.0035		unknown		Thireau M (1975) Bull. Mus. Natn. Hist. Nat. Paris. Zool. 207:467-482
Urodela	Plethodontidae	Batrachoseps	attenuatus		Batrachoseps_attenuatus	1	m	Mass	0.87		0.0035		unknown		Thireau M (1975) Bull. Mus. Natn. Hist. Nat. Paris. Zool. 207:467-482
Urodela	Plethodontidae	Batrachoseps	attenuatus		Batrachoseps_attenuatus	1	m	Mass	0.57		0.0027		unknown		Thireau M (1975) Bull. Mus. Natn. Hist. Nat. Paris. Zool. 207:467-482
Urodela	Plethodontidae	Batrachoseps	attenuatus		Batrachoseps_attenuatus	1	m	Mass	1.22		0.0039		unknown		Thireau M (1975) Bull. Mus. Natn. Hist. Nat. Paris. Zool. 207:467-482
Urodela	Plethodontidae	Batrachoseps	attenuatus		Batrachoseps_attenuatus	1	m	Mass	0.99		0.0037		unknown		Thireau M (1975) Bull. Mus. Natn. Hist. Nat. Paris. Zool. 207:467-482
Urodela	Plethodontidae	Batrachoseps	attenuatus		Batrachoseps_attenuatus	1	m	Mass	0.97		0.0035		unknown		Thireau M (1975) Bull. Mus. Natn. Hist. Nat. Paris. Zool. 207:467-482
Urodela	Plethodontidae	Batrachoseps	attenuatus		Batrachoseps_attenuatus	1	m	Mass	0.65		0.0031		unknown		Thireau M (1975) Bull. Mus. Natn. Hist. Nat. Paris. Zool. 207:467-482
Urodela	Plethodontidae	Batrachoseps	attenuatus		Batrachoseps_attenuatus	1	m	Mass	1.15		0.0039		unknown		Thireau M (1975) Bull. Mus. Natn. Hist. Nat. Paris. Zool. 207:467-482
Urodela	Plethodontidae	Batrachoseps	attenuatus		Batrachoseps_attenuatus	1	m	Mass	0.83		0.0036		unknown		Thireau M (1975) Bull. Mus. Natn. Hist. Nat. Paris. Zool. 207:467-482
Urodela	Plethodontidae	Batrachoseps	attenuatus		Batrachoseps_attenuatus	1	m	Mass	1.12		0.004		unknown		Thireau M (1975) Bull. Mus. Natn. Hist. Nat. Paris. Zool. 207:467-482
Urodela	Plethodontidae	Batrachoseps	attenuatus		Batrachoseps_attenuatus	1	m	Mass	0.83		0.0036		unknown		Thireau M (1975) Bull. Mus. Natn. Hist. Nat. Paris. Zool. 207:467-482
Urodela	Plethodontidae	Bolitoglossa	altamazonica		Bolitoglossa_altamazonica	1	unknown	Mass	1		0.0088		unknown		Thireau M (1975) Bull. Mus. Natn. Hist. Nat. Paris. Zool. 207:483-501
Urodela	Plethodontidae	Desmognathus	monticola		Desmognathus_monticola	1	unknown	Mass	3.9		0.0108		unknown		Thireau M (1975) Bull. Mus. Natn. Hist. Nat. Paris. Zool. 207:483-501
Urodela	Plethodontidae	Ensatina	eschscholtzii	xanthopica	Ensatina_eschscholtzii	2	unknown	Mass	4.05		0.027		unknown		Thireau M (1975) Bull. Mus. Natn. Hist. Nat. Paris. Zool. 207:483-501
Urodela	Plethodontidae	Eurycea	bislineata	wilderae	Eurycea_bislineata	1	unknown	Mass	1.34		0.0078		unknown		Thireau M (1975) Bull. Mus. Natn. Hist. Nat. Paris. Zool. 207:483-501
Urodela	Plethodontidae	Eurycea	longicauda		Eurycea_longicauda	3	unknown	Mass	2.04		0.0142		unknown		Thireau M (1975) Bull. Mus. Natn. Hist. Nat. Paris. Zool. 207:483-501
Urodela	Plethodontidae	Hydromantes	strinatii		Hydromantes_strinatii	13	unknown	Mass	2.27		0.0218		unknown	Hydromantes italicus strinatii	Thireau M (1975) Bull. Mus. Natn. Hist. Nat. Paris. Zool. 207:483-501
Urodela	Plethodontidae	Plethodon	cinereus		Plethodon_cinereus	11	unknown	Mass	0.89		0.0064		unknown		Thireau M (1975) Bull. Mus. Natn. Hist. Nat. Paris. Zool. 207:483-501
Urodela	Plethodontidae	Plethodon	glutinosus		Plethodon_glutinosus	1	unknown	Mass	1.9		0.0128		unknown		Thireau M (1975) Bull. Mus. Natn. Hist. Nat. Paris. Zool. 207:483-501
Urodela	Plethodontidae	Plethodon	jordani	shermani	Plethodon_jordani	1	unknown	Mass	0.72		0.006		unknown		Thireau M (1975) Bull. Mus. Natn. Hist. Nat. Paris. Zool. 207:483-501
Urodela	Plethodontidae	Plethodon	richmondi		Plethodon_richmondi	7	unknown	Mass	1.24		0.0084		unknown		Thireau M (1975) Bull. Mus. Natn. Hist. Nat. Paris. Zool. 207:483-501
Urodela	Plethodontidae	Speleomantes	italicus		Hydromantes_italicus	1	f	Mass	2.19		0.0202		unknown		Thireau M (1975) Bull. Mus. Natn. Hist. Nat. Paris. Zool. 207:467-482
Urodela	Plethodontidae	Speleomantes	italicus		Hydromantes_italicus	1	f	Mass	2.51		0.023		unknown		Thireau M (1975) Bull. Mus. Natn. Hist. Nat. Paris. Zool. 207:467-482
Urodela	Plethodontidae	Speleomantes	italicus		Hydromantes_italicus	1	f	Mass	2.85		0.0226		unknown		Thireau M (1975) Bull. Mus. Natn. Hist. Nat. Paris. Zool. 207:467-482
Urodela	Plethodontidae	Speleomantes	italicus		Hydromantes_italicus	1	f	Mass	2.18		0.0191		unknown		Thireau M (1975) Bull. Mus. Natn. Hist. Nat. Paris. Zool. 207:467-482
Urodela	Plethodontidae	Speleomantes	italicus		Hydromantes_italicus	1	f	Mass	1.94		0.0178		unknown		Thireau M (1975) Bull. Mus. Natn. Hist. Nat. Paris. Zool. 207:467-482
Urodela	Plethodontidae	Speleomantes	italicus		Hydromantes_italicus	1	f	Mass	1.62		0.0195		unknown		Thireau M (1975) Bull. Mus. Natn. Hist. Nat. Paris. Zool. 207:467-482
Urodela	Plethodontidae	Speleomantes	italicus		Hydromantes_italicus	1	f	Mass	2.85		0.0215		unknown		Thireau M (1975) Bull. Mus. Natn. Hist. Nat. Paris. Zool. 207:467-482
Urodela	Plethodontidae	Speleomantes	italicus		Hydromantes_italicus	1	m	Mass	2.55		0.0243		unknown		Thireau M (1975) Bull. Mus. Natn. Hist. Nat. Paris. Zool. 207:467-482
Urodela	Plethodontidae	Speleomantes	italicus		Hydromantes_italicus	1	m	Mass	1.9		0.0222		unknown		Thireau M (1975) Bull. Mus. Natn. Hist. Nat. Paris. Zool. 207:467-482
Urodela	Plethodontidae	Speleomantes	italicus		Hydromantes_italicus	1	m	Mass	2.26		0.0191		unknown		Thireau M (1975) Bull. Mus. Natn. Hist. Nat. Paris. Zool. 207:467-482
Urodela	Plethodontidae	Speleomantes	italicus		Hydromantes_italicus	1	m	Mass	2.16		0.0252		unknown		Thireau M (1975) Bull. Mus. Natn. Hist. Nat. Paris. Zool. 207:467-482
Urodela	Plethodontidae	Speleomantes	italicus		Hydromantes_italicus	1	m	Mass	2.2		0.0208		unknown		Thireau M (1975) Bull. Mus. Natn. Hist. Nat. Paris. Zool. 207:467-482
Urodela	Plethodontidae	Speleomantes	italicus		Hydromantes_italicus	1	m	Mass	2.28		0.0197		unknown		Thireau M (1975) Bull. Mus. Natn. Hist. Nat. Paris. Zool. 207:467-482
Urodela	Proteidae	Necturus	maculosus		Necturus_maculosus	2	unknown	Mass	94.85		0.114		unknown		Thireau M (1975) Bull. Mus. Natn. Hist. Nat. Paris. Zool. 207:483-501
Urodela	Proteidae	Proteus	anguinus		Proteus_anguinus	3	unknown	Mass	15.33		0.0337		unknown		Thireau M (1975) Bull. Mus. Natn. Hist. Nat. Paris. Zool. 207:483-501
Urodela	Salamandridae	Calotriton	asper	castelmoulinensis	Calotriton_asper	33	unknown	Mass	6.01		0.0252		unknown	Euproctus_asper	Thireau M (1975) Bull. Mus. Natn. Hist. Nat. Paris. Zool. 207:483-501
Urodela	Salamandridae	Calotriton	asper		Calotriton_asper	9	unknown	Mass	7.04		0.0253		unknown	Euproctus_asper	Thireau M (1975) Bull. Mus. Natn. Hist. Nat. Paris. Zool. 207:483-501
Urodela	Salamandridae	Cynops	pyrrhogaster		Cynops_pyrrhogaster	3	unknown	Mass	4.08		0.0186		unknown		Thireau M (1975) Bull. Mus. Natn. Hist. Nat. Paris. Zool. 207:483-501
Urodela	Salamandridae	Euproctus	montanus		Euproctus_montanus	3	unknown	Mass	2.05		0.0144		unknown		Thireau M (1975) Bull. Mus. Natn. Hist. Nat. Paris. Zool. 207:483-501
Urodela	Salamandridae	Ichthyosaura	alpestris		Ichthyosaura_alpestris	1	f	Mass	3.35		0.015		unknown	Triturus_alpestris	Thireau M (1975) Bull. Mus. Natn. Hist. Nat. Paris. Zool. 207:467-482
Urodela	Salamandridae	Ichthyosaura	alpestris		Ichthyosaura_alpestris	1	f	Mass	2.89		0.0161		unknown	Triturus_alpestris	Thireau M (1975) Bull. Mus. Natn. Hist. Nat. Paris. Zool. 207:467-482
Urodela	Salamandridae	Ichthyosaura	alpestris		Ichthyosaura_alpestris	1	f	Mass	2.81		0.0143		unknown	Triturus_alpestris	Thireau M (1975) Bull. Mus. Natn. Hist. Nat. Paris. Zool. 207:467-482
Urodela	Salamandridae	Ichthyosaura	alpestris		Ichthyosaura_alpestris	1	f	Mass	2.83		0.0175		unknown	Triturus_alpestris	Thireau M (1975) Bull. Mus. Natn. Hist. Nat. Paris. Zool. 207:467-482
Urodela	Salamandridae	Ichthyosaura	alpestris		Ichthyosaura_alpestris	1	f	Mass	2.29		0.0127		unknown	Triturus_alpestris	Thireau M (1975) Bull. Mus. Natn. Hist. Nat. Paris. Zool. 207:467-482
Urodela	Salamandridae	Ichthyosaura	alpestris		Ichthyosaura_alpestris	1	f	Mass	2.91		0.0152		unknown	Triturus_alpestris	Thireau M (1975) Bull. Mus. Natn. Hist. Nat. Paris. Zool. 207:467-482
Urodela	Salamandridae	Ichthyosaura	alpestris		Ichthyosaura_alpestris	1	f	Mass	1.65		0.0118		unknown	Triturus_alpestris	Thireau M (1975) Bull. Mus. Natn. Hist. Nat. Paris. Zool. 207:467-482
Urodela	Salamandridae	Ichthyosaura	alpestris		Ichthyosaura_alpestris	1	f	Mass	3.62		0.016		unknown	Triturus_alpestris	Thireau M (1975) Bull. Mus. Natn. Hist. Nat. Paris. Zool. 207:467-482
Urodela	Salamandridae	Ichthyosaura	alpestris		Ichthyosaura_alpestris	1	f	Mass	2.46		0.0134		unknown	Triturus_alpestris	Thireau M (1975) Bull. Mus. Natn. Hist. Nat. Paris. Zool. 207:467-482
Urodela	Salamandridae	Ichthyosaura	alpestris		Ichthyosaura_alpestris	1	f	Mass	2.14		0.0128		unknown	Triturus_alpestris	Thireau M (1975) Bull. Mus. Natn. Hist. Nat. Paris. Zool. 207:467-482
Urodela	Salamandridae	Ichthyosaura	alpestris		Ichthyosaura_alpestris	1	f	Mass	3.44		0.0155		unknown	Triturus_alpestris	Thireau M (1975) Bull. Mus. Natn. Hist. Nat. Paris. Zool. 207:467-482
Urodela	Salamandridae	Ichthyosaura	alpestris		Ichthyosaura_alpestris	1	m	Mass	2.33		0.0146		unknown	Triturus_alpestris	Thireau M (1975) Bull. Mus. Natn. Hist. Nat. Paris. Zool. 207:467-482
Urodela	Salamandridae	Ichthyosaura	alpestris		Ichthyosaura_alpestris	1	m	Mass	1.77		0.0123		unknown	Triturus_alpestris	Thireau M (1975) Bull. Mus. Natn. Hist. Nat. Paris. Zool. 207:467-482
Urodela	Salamandridae	Ichthyosaura	alpestris		Ichthyosaura_alpestris	1	m	Mass	2.41		0.0137		unknown	Triturus_alpestris	Thireau M (1975) Bull. Mus. Natn. Hist. Nat. Paris. Zool. 207:467-482
Urodela	Salamandridae	Ichthyosaura	alpestris		Ichthyosaura_alpestris	1	m	Mass	2.07		0.013		unknown	Triturus_alpestris	Thireau M (1975) Bull. Mus. Natn. Hist. Nat. Paris. Zool. 207:467-482
Urodela	Salamandridae	Ichthyosaura	alpestris		Ichthyosaura_alpestris	1	m	Mass	2.25		0.014		unknown	Triturus_alpestris	Thireau M (1975) Bull. Mus. Natn. Hist. Nat. Paris. Zool. 207:467-482
Urodela	Salamandridae	Ichthyosaura	alpestris		Ichthyosaura_alpestris	1	m	Mass	2.34		0.0133		unknown	Triturus_alpestris	Thireau M (1975) Bull. Mus. Natn. Hist. Nat. Paris. Zool. 207:467-482
Urodela	Salamandridae	Ichthyosaura	alpestris		Ichthyosaura_alpestris	1	m	Mass	2.19		0.0148		unknown	Triturus_alpestris	Thireau M (1975) Bull. Mus. Natn. Hist. Nat. Paris. Zool. 207:467-482
Urodela	Salamandridae	Ichthyosaura	alpestris		Ichthyosaura_alpestris	1	m	Mass	2.55		0.0164		unknown	Triturus_alpestris	Thireau M (1975) Bull. Mus. Natn. Hist. Nat. Paris. Zool. 207:467-482
Urodela	Salamandridae	Ichthyosaura	alpestris		Ichthyosaura_alpestris	1	m	Mass	2.18		0.0121		unknown	Triturus_alpestris	Thireau M (1975) Bull. Mus. Natn. Hist. Nat. Paris. Zool. 207:467-482
Urodela	Salamandridae	Ichthyosaura	alpestris		Ichthyosaura_alpestris	1	m	Mass	1.73		0.0137		unknown	Triturus_alpestris	Thireau M (1975) Bull. Mus. Natn. Hist. Nat. Paris. Zool. 207:467-482
Urodela	Salamandridae	Ichthyosaura	alpestris		Ichthyosaura_alpestris	1	m	Mass	2.25		0.0142		unknown	Triturus_alpestris	Thireau M (1975) Bull. Mus. Natn. Hist. Nat. Paris. Zool. 207:467-482
Urodela	Salamandridae	Ichthyosaura	alpestris		Ichthyosaura_alpestris	1	m	Mass	2.07		0.0148		unknown	Triturus_alpestris	Thireau M (1975) Bull. Mus. Natn. Hist. Nat. Paris. Zool. 207:467-482
Urodela	Salamandridae	Ichthyosaura	alpestris		Ichthyosaura_alpestris	1	m	Mass	2.34		0.0146		unknown	Triturus_alpestris	Thireau M (1975) Bull. Mus. Natn. Hist. Nat. Paris. Zool. 207:467-482
Urodela	Salamandridae	Lissotriton	boscai		Lissotriton_boscai	3	unknown	Mass	1.92		0.0127		unknown	Triturus_boscai	Thireau M (1975) Bull. Mus. Natn. Hist. Nat. Paris. Zool. 207:483-501
Urodela	Salamandridae	Lissotriton	helveticus		Lissotriton_helveticus	78	unknown	Mass	1.01		0.008		unknown	Triturus_helveticus	Thireau M (1975) Bull. Mus. Natn. Hist. Nat. Paris. Zool. 207:483-501
Urodela	Salamandridae	Lissotriton	montandoni		Lissotriton_montandoni	9	unknown	Mass	1.23		0.0091		unknown	Triturus_montandoni	Thireau M (1975) Bull. Mus. Natn. Hist. Nat. Paris. Zool. 207:483-501
Urodela	Salamandridae	Lissotriton	vulgaris		Lissotriton_vulgaris	15	unknown	Mass	1.15		0.0084		unknown	Triturus_vulgaris	Thireau M (1975) Bull. Mus. Natn. Hist. Nat. Paris. Zool. 207:483-501
Urodela	Salamandridae	Notophthalmus	viridescens		Notophthalmus_viridescens	1	unknown	Mass	2.18		0.0102		unknown		Thireau M (1975) Bull. Mus. Natn. Hist. Nat. Paris. Zool. 207:483-501
Urodela	Salamandridae	Pleurodeles	waltl		Pleurodeles_waltl	4	unknown	Mass	17.24		0.0323		unknown		Thireau M (1975) Bull. Mus. Natn. Hist. Nat. Paris. Zool. 207:483-501
Urodela	Salamandridae	Salamandra	atra		Salamandra_atra	1	f	Mass	10.33		0.0326		unknown		Thireau M (1975) Bull. Mus. Natn. Hist. Nat. Paris. Zool. 207:467-482
Urodela	Salamandridae	Salamandra	atra		Salamandra_atra	1	f	Mass	8.42		0.0304		unknown		Thireau M (1975) Bull. Mus. Natn. Hist. Nat. Paris. Zool. 207:467-482
Urodela	Salamandridae	Salamandra	atra		Salamandra_atra	1	f	Mass	4.88		0.0276		unknown		Thireau M (1975) Bull. Mus. Natn. Hist. Nat. Paris. Zool. 207:467-482
Urodela	Salamandridae	Salamandra	atra		Salamandra_atra	1	f	Mass	8.23		0.031		unknown		Thireau M (1975) Bull. Mus. Natn. Hist. Nat. Paris. Zool. 207:467-482
Urodela	Salamandridae	Salamandra	atra		Salamandra_atra	1	f	Mass	5.33		0.0222		unknown		Thireau M (1975) Bull. Mus. Natn. Hist. Nat. Paris. Zool. 207:467-482
Urodela	Salamandridae	Salamandra	atra		Salamandra_atra	1	f	Mass	5.02		0.024		unknown		Thireau M (1975) Bull. Mus. Natn. Hist. Nat. Paris. Zool. 207:467-482
Urodela	Salamandridae	Salamandra	atra		Salamandra_atra	1	m	Mass	5.11		0.0245		unknown		Thireau M (1975) Bull. Mus. Natn. Hist. Nat. Paris. Zool. 207:467-482
Urodela	Salamandridae	Salamandra	atra		Salamandra_atra	1	m	Mass	3.26		0.0218		unknown		Thireau M (1975) Bull. Mus. Natn. Hist. Nat. Paris. Zool. 207:467-482
Urodela	Salamandridae	Salamandra	atra		Salamandra_atra	1	m	Mass	5.51		0.03		unknown		Thireau M (1975) Bull. Mus. Natn. Hist. Nat. Paris. Zool. 207:467-482
Urodela	Salamandridae	Salamandra	atra		Salamandra_atra	1	m	Mass	6.33		0.0256		unknown		Thireau M (1975) Bull. Mus. Natn. Hist. Nat. Paris. Zool. 207:467-482
Urodela	Salamandridae	Salamandra	atra		Salamandra_atra	1	m	Mass	6.35		0.0276		unknown		Thireau M (1975) Bull. Mus. Natn. Hist. Nat. Paris. Zool. 207:467-482
Urodela	Salamandridae	Salamandra	atra		Salamandra_atra	1	m	Mass	5.95		0.0292		unknown		Thireau M (1975) Bull. Mus. Natn. Hist. Nat. Paris. Zool. 207:467-482
Urodela	Salamandridae	Salamandra	atra		Salamandra_atra	1	m	Mass	6		0.0284		unknown		Thireau M (1975) Bull. Mus. Natn. Hist. Nat. Paris. Zool. 207:467-482
Urodela	Salamandridae	Salamandra	infraimmaculata		Salamandra_infraimmaculata	1	unknown	Mass	24.88		0.047		unknown	Salamandra maculosa	Dubois E (1913) On the relation between the quantity of brain and the size of the body in vertebrates
Urodela	Salamandridae	Salamandra	salamandra	fastuosa	Salamandra_salamandra	75	unknown	Mass	18.66		0.0407		unknown		Thireau M (1975) Bull. Mus. Natn. Hist. Nat. Paris. Zool. 207:483-501
Urodela	Salamandridae	Salamandra	salamandra	terrestris	Salamandra_salamandra	1	f	Mass	19.2		0.042		unknown		Thireau M (1975) Bull. Mus. Natn. Hist. Nat. Paris. Zool. 207:467-482
Urodela	Salamandridae	Salamandra	salamandra	terrestris	Salamandra_salamandra	1	f	Mass	17.1		0.048		unknown		Thireau M (1975) Bull. Mus. Natn. Hist. Nat. Paris. Zool. 207:467-482
Urodela	Salamandridae	Salamandra	salamandra	terrestris	Salamandra_salamandra	1	f	Mass	7		0.036		unknown		Thireau M (1975) Bull. Mus. Natn. Hist. Nat. Paris. Zool. 207:467-482
Urodela	Salamandridae	Salamandra	salamandra	terrestris	Salamandra_salamandra	1	f	Mass	12.7		0.04		unknown		Thireau M (1975) Bull. Mus. Natn. Hist. Nat. Paris. Zool. 207:467-482
Urodela	Salamandridae	Salamandra	salamandra	terrestris	Salamandra_salamandra	1	f	Mass	11		0.034		unknown		Thireau M (1975) Bull. Mus. Natn. Hist. Nat. Paris. Zool. 207:467-482
Urodela	Salamandridae	Salamandra	salamandra	terrestris	Salamandra_salamandra	1	f	Mass	22.8		0.046		unknown		Thireau M (1975) Bull. Mus. Natn. Hist. Nat. Paris. Zool. 207:467-482
Urodela	Salamandridae	Salamandra	salamandra	terrestris	Salamandra_salamandra	1	f	Mass	10.4		0.0315		unknown		Thireau M (1975) Bull. Mus. Natn. Hist. Nat. Paris. Zool. 207:467-482
Urodela	Salamandridae	Salamandra	salamandra	terrestris	Salamandra_salamandra	1	f	Mass	11		0.036		unknown		Thireau M (1975) Bull. Mus. Natn. Hist. Nat. Paris. Zool. 207:467-482
Urodela	Salamandridae	Salamandra	salamandra	terrestris	Salamandra_salamandra	1	f	Mass	14.49		0.0334		unknown		Thireau M (1975) Bull. Mus. Natn. Hist. Nat. Paris. Zool. 207:467-482
Urodela	Salamandridae	Salamandra	salamandra	terrestris	Salamandra_salamandra	1	f	Mass	11.03		0.0366		unknown		Thireau M (1975) Bull. Mus. Natn. Hist. Nat. Paris. Zool. 207:467-482
Urodela	Salamandridae	Salamandra	salamandra	terrestris	Salamandra_salamandra	1	f	Mass	11.52		0.0322		unknown		Thireau M (1975) Bull. Mus. Natn. Hist. Nat. Paris. Zool. 207:467-482
Urodela	Salamandridae	Salamandra	salamandra	terrestris	Salamandra_salamandra	1	f	Mass	17.78		0.0426		unknown		Thireau M (1975) Bull. Mus. Natn. Hist. Nat. Paris. Zool. 207:467-482
Urodela	Salamandridae	Salamandra	salamandra	terrestris	Salamandra_salamandra	1	f	Mass	10.7		0.0344		unknown		Thireau M (1975) Bull. Mus. Natn. Hist. Nat. Paris. Zool. 207:467-482
Urodela	Salamandridae	Salamandra	salamandra	terrestris	Salamandra_salamandra	1	f	Mass	9.22		0.0264		unknown		Thireau M (1975) Bull. Mus. Natn. Hist. Nat. Paris. Zool. 207:467-482
Urodela	Salamandridae	Salamandra	salamandra	terrestris	Salamandra_salamandra	1	f	Mass	12.35		0.0316		unknown		Thireau M (1975) Bull. Mus. Natn. Hist. Nat. Paris. Zool. 207:467-482
Urodela	Salamandridae	Salamandra	salamandra	terrestris	Salamandra_salamandra	1	m	Mass	9.75		0.034		unknown		Thireau M (1975) Bull. Mus. Natn. Hist. Nat. Paris. Zool. 207:467-482
Urodela	Salamandridae	Salamandra	salamandra	terrestris	Salamandra_salamandra	1	m	Mass	8.9		0.039		unknown		Thireau M (1975) Bull. Mus. Natn. Hist. Nat. Paris. Zool. 207:467-482
Urodela	Salamandridae	Salamandra	salamandra	terrestris	Salamandra_salamandra	1	m	Mass	10.8		0.038		unknown		Thireau M (1975) Bull. Mus. Natn. Hist. Nat. Paris. Zool. 207:467-482
Urodela	Salamandridae	Salamandra	salamandra	terrestris	Salamandra_salamandra	1	m	Mass	8.85		0.032		unknown		Thireau M (1975) Bull. Mus. Natn. Hist. Nat. Paris. Zool. 207:467-482
Urodela	Salamandridae	Salamandra	salamandra	terrestris	Salamandra_salamandra	1	m	Mass	7.78		0.0343		unknown		Thireau M (1975) Bull. Mus. Natn. Hist. Nat. Paris. Zool. 207:467-482
Urodela	Salamandridae	Taricha	rivularis		Taricha_rivularis	7	unknown	Mass	11		0.0338		unknown		Thireau M (1975) Bull. Mus. Natn. Hist. Nat. Paris. Zool. 207:483-501
Urodela	Salamandridae	Triturus	cristatus		Triturus_cristatus	1	unknown	Mass	7.46		0.019		adult	Triton cristatus	Dubois E (1913) On the relation between the quantity of brain and the size of the body in vertebrates
Urodela	Salamandridae	Triturus	cristatus		Triturus_cristatus	3	unknown	Mass	5.83		0.0229		unknown	Triton cristatus	Thireau M (1975) Bull. Mus. Natn. Hist. Nat. Paris. Zool. 207:483-501
Urodela	Salamandridae	Triturus	marmoratus		Triturus_marmoratus	3	unknown	Mass	10.43		0.0306		unknown		Thireau M (1975) Bull. Mus. Natn. Hist. Nat. Paris. Zool. 207:483-501
Urodela	Salamandridae	Tylototriton	verrucosus		Tylototriton_verrucosus	3	unknown	Mass	12.92		0.0349		unknown		Thireau M (1975) Bull. Mus. Natn. Hist. Nat. Paris. Zool. 207:483-501
